# Supplementary material
Source: publisher figshare collection journal article supplement (https://karger.figshare.com/articles/dataset/_/5124193)
Supplement: Supplementary file 1 [file 1]

### **Online Supplementary Material**

Shi, Y., et al. (2012) Analysis of differentiation potentials and gene expression profiles of mesenchymal stem cells derived from periodontal ligament and Wharton's jelly of the umbilical cord. *Cells Tissues Organs*, DOI: 10.1159/000 343740.

**Supplementary Table1. Primers sequences used in the Real-time RT-PCR**

| Gene Symbol | Primer Sequences (5'--3')      | Accession Number | Product Length (bp) |
|-------------|--------------------------------|------------------|---------------------|
| GAPDH-F     | CGAACCTCTCTGCTCCTCTGTTTCG      | NM_002046        | 83                  |
| GAPDH-R     | CATGGTGTCTGAGCGATGTGG          |                  |                     |
| HOXD10-F    | AGTGCAGGAGAAGGAAAGCA           | NM_002148        | 80                  |
| HOXD10-R    | TTCTGCCACTCTTTGCAGTG           |                  |                     |
| HOXA9-F     | CGGTTATGGCATTAAACCTGAACCG      | NM_152739        | 67                  |
| HOXA9-R     | GTGAGTGTCAAGCGTGGGACAG         |                  |                     |
| HOXC8-F     | CGGTAAGTTCCAAGGTCTGATACCG      | NM_022658        | 99                  |
| HOXC8-R     | CGTCTCCAGCCTCATGTTTC           |                  |                     |
| TFAP2A-F    | CTGCAGGGAGACGTAAAGC            | NM_003220        | 74                  |
| TFAP2A-R    | GGCTAGGTGGACAGCTTCTC           |                  |                     |
| HOXB6-F     | CGGGCCACTTCCTCCTATTACCCG       | NM_018952        | 104                 |
| HOXB6-R     | GCCGACTCTTTCTCGCGGTAG          |                  |                     |
| CD24-F      | TCACTTTCCTCCTGAGGCTT           | NM_013230        | 125                 |
| CD24-R      | TCAAGAGTTGCTCAGGATGC           |                  |                     |
| MEIS2-F     | CGGATGCCTAGATCACTTTCTTATCCG    | NM_170677        | 70                  |
| MEIS2-R     | TCTGCGCTCCAATAAACTCCTG         |                  |                     |
| SHANK2-F    | CGGTGGAACCTTGACCCTGTCACCG      | NM_012309        | 79                  |
| SHANK2-R    | CGTCGCTGTCAAGCCATACC           |                  |                     |
| PPARG-F     | CGAGACCAACAGCTTCTCCTTCTCG      | NM_005037        | 90                  |
| PPARG-R     | TTTCAGAAATGCCTTGCAAGTGG        |                  |                     |
| WNT2B-F     | CTTTCCTTTGCACCAAGCTTC          | NM_004185        | 52                  |
| WNT2B-R     | TACCCCTTCTCTTGACACACC          |                  |                     |
| WNT16-F     | GAGCTGTGCAAGAGGAAACC           | NM_057168        | 108                 |
| WNT16-R     | TCATGCAGTTCCATCTCTCG           |                  |                     |
| BARX1-F     | CGCTTCGAGAAGCAGAAGTA           | NM_021570        | 111                 |
| BARX1-R     | CTTCATCCTCCGATTCTGGT           |                  |                     |
| SATB1-F     | CCCGTAAGCATGAAACCAGT           | NM_001131010     | 144                 |
| SATB1-R     | GGGCAAGTTTCCAAAGATCA           |                  |                     |
| SATB2-F     | CCTCCTCCGACTGAAGACAG           | NM_001172509     | 115                 |
| SATB2-R     | TGGTCTGGGTACAGGCCTAC           |                  |                     |
| IGFBP2-F    | CGTTCAAGTGCAAGATGTCTCTGAACG    | NM_000597        | 71                  |
| IGFBP2-R    | GGATCAGCTTCCCGGTGTTG           |                  |                     |
| IGFBP5-F    | GCACCTGAGATGAGACAGGA           | NM_000599        | 139                 |
| IGFBP5-R    | TGTAGAATCCTTTGCGGTCA           |                  |                     |
| DLX2-F      | CCTGAGAAGGAGGACCTTGA           | NM_004405        | 65                  |
| DLX2-R      | TTCCGGACTTTCTTTGGCT            |                  |                     |
| DLX5-F      | CGCTAGCTCCTACCACCAGT           | NM_005221        | 84                  |
| DXL5-R      | GGCTCGGTCACTTCTTTCTC           |                  |                     |
| S100A4-F    | GTACTTGGTGTCCACCTTCCACAAGTAC   | NM_002961        | 85                  |
| S100A4-R    | CCGGGTCAGCAGCTCCTTTAG          |                  |                     |
| BSP-F       | CAGGCCACGATATTATCTTTACA        | NM_004967        | 133                 |
| BSP-R       | CTCCTCTTCTTCTCCTCCTC           |                  |                     |
| OSX-F       | CCTCCTCAGCTCACCTTCTC           | NM_001173467     | 148                 |
| OSX-R       | GTTGGGAGCCCAAATAGAAA           |                  |                     |
| OPN-F       | ATGATGGCCGAGGTGATAGT           | NM_001040058     | 134                 |
| OPN-R       | ACCATTCAACTCCTCGCTTT           |                  |                     |
| LPL-F       | CGGATTAACATTGGAGAAGCTATCCG     | NM_000237        | 65                  |
| LPL-R       | AGCTGGTCCACATCTCCAAGTC         |                  |                     |
| CD36-F      | CGATTAACATAAGTAAAGTTGCCATAATCG | NM_001001548     | 78                  |
| CD36-R      | CGCAGTGACTTTCCCAATAGGAC        |                  |                     |
| CEBPA-F     | CGGCTTATCCTAAATACTAGAGTTGCCG   | NM_004364        | 113                 |
| CEBPA-R     | GGACTTGGTGCGTCTAAGATGA         |                  |                     |
| NANOG-F     | CCCTAATTTGTTGGTTGTGCTAA        | NM_024865        | 64                  |
| NANOG-R     | CGTATTCAATTACGATGCAGCAAATACG   |                  |                     |
| OCT4-F      | CGGTTTCGAGTGTGGTTCTGTAACCG     | NM_002701        | 61                  |
| OCT4-R      | GTTGTGCATAGTCGCTGCTTGA         |                  |                     |
| SOX2-F      | CGAGTACCTACAGCATGTCCTACTCG     | NM_003106        | 86                  |
| SOX2-R      | GAGCTGGCCTCGGACTTGAC           |                  |                     |
| COL2-F      | CATCCCACCCTCTCACAGTT           | NM_001844        | 65                  |
| COL2-R      | TCTGCCCAGTTCAGGTCTCT           |                  |                     |
| SOX9-F      | CCCTTCAACCTCCCACTA             | NM_000346        | 74                  |
| SOX9-R      | TGGTGGTCGGTGTAGTCGTA           |                  |                     |

## Online Supplementary Material

Shi, Y., et al. (2012) Analysis of differentiation potentials and gene expression profiles of mesenchymal stem cells derived from periodontal ligament and Wharton's jelly of the umbilical cord. Cells Tissues Organs, DOI: 10.1159/000 343740.

Supplementary table 2. Microarray data of WJCMSCs and PDLSCs

| Gene Symbol | Log <sub>2</sub> <sup>signal intensities</sup><br>(WJCMSCs/PDLSCs) | regulation | p-value  | FDR      |
|-------------|--------------------------------------------------------------------|------------|----------|----------|
| DSC3        | 77.24                                                              | up         | 3.31E-10 | 1.45E-09 |
| CD200       | 72.1                                                               | up         | 1.59E-10 | 8.66E-10 |
| IL1A        | 65.36                                                              | up         | 2.58E-09 | 6.06E-09 |
| IL1B        | 63.76                                                              | up         | 1.16E-09 | 3.42E-09 |
| KRT8        | 39.09                                                              | up         | 2.47E-07 | 2.73E-07 |
| RPS4Y1      | 26.31                                                              | up         | 9.08E-10 | 2.91E-09 |
| GPR126      | 23.51                                                              | up         | 1.31E-07 | 1.54E-07 |
| DSG2        | 23.49                                                              | up         | 5.11E-10 | 1.89E-09 |
| TBX20       | 19.65                                                              | up         | 1.66E-09 | 4.34E-09 |
| TMEM154     | 19.41                                                              | up         | 1.75E-08 | 2.71E-08 |
| SPON2       | 19.32                                                              | up         | 6.84E-09 | 1.31E-08 |
| DPP4        | 18.43                                                              | up         | 3.03E-12 | 1.49E-10 |
| TNIK        | 18.33                                                              | up         | 4.23E-11 | 3.61E-10 |
| RNU5D       | 17.75                                                              | up         | 1.92E-07 | 2.15E-07 |
| NPY         | 15.88                                                              | up         | 1.27E-06 | 1.28E-06 |
| ALDH1A1     | 15.82                                                              | up         | 1.24E-08 | 2.06E-08 |
| HOXD10      | 15.82                                                              | up         | 4.02E-08 | 5.39E-08 |
| DDX3Y       | 15.31                                                              | up         | 3.40E-09 | 7.48E-09 |
| PCDH10      | 15.3                                                               | up         | 5.30E-11 | 4.27E-10 |
| MAB21L2     | 15.26                                                              | up         | 4.20E-07 | 4.45E-07 |
| BHLHE41     | 14.24                                                              | up         | 7.99E-10 | 2.66E-09 |
| NLGN4Y      | 14.1                                                               | up         | 1.71E-07 | 1.95E-07 |
| ANXA3       | 14.03                                                              | up         | 7.22E-08 | 9.02E-08 |
| ABCA1       | 13.54                                                              | up         | 2.40E-10 | 1.11E-09 |
| CHI3L1      | 12.91                                                              | up         | 4.09E-06 | 4.09E-06 |
| NRP2        | 12.9                                                               | up         | 1.29E-10 | 7.86E-10 |
| ST8SIA4     | 12.53                                                              | up         | 1.86E-08 | 2.85E-08 |
| IQGAP2      | 12.29                                                              | up         | 2.00E-09 | 5.00E-09 |
| CXCL6       | 12.24                                                              | up         | 4.30E-07 | 4.55E-07 |
| MIR31       | 12.23                                                              | up         | 1.54E-08 | 2.44E-08 |
| TEK         | 12.18                                                              | up         | 2.91E-09 | 6.65E-09 |
| MIR622      | 11.98                                                              | up         | 2.02E-09 | 5.03E-09 |
| TMEM88      | 11.88                                                              | up         | 8.01E-08 | 9.88E-08 |
| KRT18       | 11.74                                                              | up         | 9.35E-09 | 1.69E-08 |
| FAM198B     | 11.52                                                              | up         | 1.34E-08 | 2.18E-08 |
| RHOJ        | 11.38                                                              | up         | 1.10E-07 | 1.31E-07 |
| ST3GAL6     | 11.22                                                              | up         | 3.07E-08 | 4.36E-08 |
| GFPT2       | 11.17                                                              | up         | 8.43E-11 | 5.95E-10 |
| SLC22A3     | 11.08                                                              | up         | 6.19E-09 | 1.20E-08 |
| PKP2        | 10.82                                                              | up         | 5.66E-10 | 2.01E-09 |
| SULT1E1     | 10.5                                                               | up         | 5.08E-08 | 6.63E-08 |
| KSR1        | 10.45                                                              | up         | 3.56E-10 | 1.52E-09 |

|            |       |    |          |          |
|------------|-------|----|----------|----------|
| RHOU       | 10.2  | up | 4.47E-07 | 4.72E-07 |
| EIF1AY     | 10.08 | up | 1.06E-08 | 1.86E-08 |
| CYorf15A   | 9.85  | up | 1.00E-07 | 1.92E-07 |
| TNFRSF9    | 9.42  | up | 6.38E-08 | 8.10E-08 |
| LINGO2     | 9.3   | up | 1.30E-07 | 1.53E-07 |
| UTY        | 9.23  | up | 1.48E-10 | 8.37E-10 |
| ST6GAL2    | 8.99  | up | 7.74E-09 | 1.44E-08 |
| IFNE       | 8.81  | up | 1.22E-08 | 2.04E-08 |
| HOXA9      | 8.73  | up | 5.35E-07 | 5.59E-07 |
| PDLIM3     | 8.65  | up | 1.98E-08 | 2.98E-08 |
| TM6SF1     | 8.56  | up | 4.14E-08 | 5.53E-08 |
| GPRC5B     | 8.4   | up | 3.07E-07 | 3.33E-07 |
| BNC1       | 8.36  | up | 1.90E-08 | 2.90E-08 |
| ADARB1     | 8.23  | up | 6.33E-10 | 2.22E-09 |
| ROR2       | 8.13  | up | 1.17E-07 | 1.39E-07 |
| LCP1       | 8.11  | up | 3.58E-08 | 4.93E-08 |
| MEIS1      | 8.09  | up | 1.23E-08 | 2.05E-08 |
| ST6GALNAC5 | 8     | up | 4.17E-11 | 3.61E-10 |
| SHC3       | 7.94  | up | 9.60E-10 | 3.03E-09 |
| VTRNA1-2   | 7.83  | up | 1.00E-07 | 1.92E-07 |
| HOXC8      | 7.67  | up | 3.16E-07 | 3.41E-07 |
| KRT18      | 7.64  | up | 1.00E-07 | 1.92E-07 |
| CDCP1      | 7.39  | up | 2.63E-08 | 3.83E-08 |
| BDKRB1     | 7.35  | up | 1.44E-12 | 1.49E-10 |
| PAPPA      | 7.33  | up | 1.62E-09 | 4.29E-09 |
| DSC2       | 7.21  | up | 1.12E-07 | 1.33E-07 |
| P4HA3      | 7.16  | up | 2.86E-09 | 6.57E-09 |
| ARHGDIB    | 7.08  | up | 1.22E-06 | 1.24E-06 |
| FAM83B     | 6.92  | up | 1.27E-08 | 2.09E-08 |
| USP9Y      | 6.81  | up | 1.55E-08 | 2.44E-08 |
| CYorf15B   | 6.76  | up | 4.31E-10 | 1.69E-09 |
| KAL1       | 6.74  | up | 5.43E-08 | 6.97E-08 |
| LRRC17     | 6.67  | up | 6.15E-09 | 1.19E-08 |
| SCD        | 6.66  | up | 4.92E-10 | 1.85E-09 |
| CXCL1      | 6.62  | up | 9.38E-09 | 1.69E-08 |
| MANBA      | 6.33  | up | 1.02E-10 | 6.88E-10 |
| NRXN3      | 6.16  | up | 2.34E-09 | 5.66E-09 |
| HOXA6      | 6.05  | up | 2.30E-08 | 3.39E-08 |
| SLITRK4    | 6.04  | up | 1.00E-07 | 1.92E-07 |
| NCKAP5     | 6.04  | up | 1.25E-07 | 1.48E-07 |
| C3         | 5.88  | up | 1.34E-08 | 2.17E-08 |
| HSD17B6    | 5.84  | up | 2.00E-07 | 3.51E-07 |
| ZFY        | 5.77  | up | 1.00E-07 | 1.92E-07 |
| TMEM156    | 5.76  | up | 2.83E-09 | 6.52E-09 |
| SCRG1      | 5.74  | up | 2.24E-07 | 2.49E-07 |
| JUP        | 5.72  | up | 1.37E-09 | 3.82E-09 |
| PBX1       | 5.71  | up | 2.21E-08 | 3.29E-08 |
| LOC554202  | 5.67  | up | 9.70E-09 | 1.73E-08 |
| PTGS2      | 5.65  | up | 4.05E-10 | 1.61E-09 |
| ADAMTS12   | 5.64  | up | 2.57E-11 | 2.92E-10 |
| HOXA11     | 5.64  | up | 5.00E-07 | 7.84E-07 |

|          |      |    |          |          |
|----------|------|----|----------|----------|
| LAMC2    | 5.62 | up | 9.94E-09 | 1.77E-08 |
| LIMCH1   | 5.56 | up | 1.23E-08 | 2.05E-08 |
| NOX4     | 5.56 | up | 5.00E-07 | 7.84E-07 |
| AMIGO2   | 5.55 | up | 5.02E-10 | 1.87E-09 |
| ITGB3    | 5.45 | up | 2.71E-09 | 6.29E-09 |
| TET1     | 5.41 | up | 8.80E-10 | 2.86E-09 |
| PLEK2    | 5.36 | up | 1.02E-08 | 1.80E-08 |
| NUAK1    | 5.35 | up | 1.62E-07 | 1.86E-07 |
| KDM5D    | 5.27 | up | 1.14E-09 | 3.42E-09 |
| ARSI     | 5.09 | up | 6.65E-08 | 8.40E-08 |
| B3GNT5   | 5    | up | 1.73E-09 | 4.40E-09 |
| CPA4     | 4.97 | up | 1.71E-09 | 4.38E-09 |
| ARHGEF3  | 4.97 | up | 5.13E-08 | 6.69E-08 |
| C11orf9  | 4.93 | up | 3.23E-08 | 4.54E-08 |
| CNTNAP3  | 4.92 | up | 1.48E-09 | 4.06E-09 |
| CNTNAP3  | 4.92 | up | 1.48E-09 | 4.06E-09 |
| CLDN1    | 4.91 | up | 2.01E-08 | 3.03E-08 |
| ST6GAL1  | 4.88 | up | 1.27E-08 | 2.10E-08 |
| PPAPDC1A | 4.84 | up | 8.46E-10 | 2.77E-09 |
| 06. Sep  | 4.79 | up | 5.32E-08 | 6.89E-08 |
| CNTNAP3  | 4.78 | up | 2.83E-11 | 2.98E-10 |
| FNBP1L   | 4.78 | up | 2.45E-08 | 3.58E-08 |
| ABCA8    | 4.77 | up | 1.64E-11 | 2.38E-10 |
| C4orf7   | 4.77 | up | 5.00E-07 | 7.84E-07 |
| CARD11   | 4.71 | up | 2.67E-08 | 3.88E-08 |
| CXADR    | 4.68 | up | 1.00E-07 | 1.92E-07 |
| PLEKHA2  | 4.61 | up | 9.79E-10 | 3.08E-09 |
| CREB5    | 4.59 | up | 8.27E-07 | 8.52E-07 |
| HOXC6    | 4.56 | up | 3.94E-09 | 8.41E-09 |
| TMCC3    | 4.54 | up | 4.60E-06 | 5.89E-06 |
| DIRAS3   | 4.53 | up | 6.84E-09 | 1.31E-08 |
| TFAP2A   | 4.52 | up | 2.12E-08 | 3.18E-08 |
| TSPAN13  | 4.49 | up | 3.41E-08 | 4.76E-08 |
| BMP6     | 4.46 | up | 1.00E-07 | 1.92E-07 |
| FADS2    | 4.42 | up | 2.06E-10 | 1.01E-09 |
| SH3RF2   | 4.4  | up | 2.40E-08 | 3.53E-08 |
| F3       | 4.39 | up | 8.81E-09 | 1.61E-08 |
| IL8      | 4.36 | up | 2.98E-09 | 6.79E-09 |
| CDKN2B   | 4.36 | up | 2.52E-06 | 2.53E-06 |
| MIR145   | 4.35 | up | 1.14E-08 | 1.96E-08 |
| STXBP5L  | 4.34 | up | 1.00E-07 | 1.92E-07 |
| HOXA7    | 4.32 | up | 2.44E-08 | 3.58E-08 |
| CCDC85A  | 4.32 | up | 2.00E-07 | 3.51E-07 |
| HSPB8    | 4.25 | up | 3.00E-07 | 5.02E-07 |
| RGS4     | 4.24 | up | 1.16E-09 | 3.42E-09 |
| 03. Mrz  | 4.23 | up | 3.29E-11 | 3.25E-10 |
| STK38L   | 4.21 | up | 3.35E-11 | 3.25E-10 |
| CENPV    | 4.21 | up | 3.52E-08 | 4.87E-08 |
| TRHDE    | 4.2  | up | 5.37E-08 | 6.91E-08 |
| VAT1L    | 4.18 | up | 5.23E-09 | 1.05E-08 |
| ANXA10   | 4.14 | up | 2.45E-08 | 3.58E-08 |

|            |      |    |          |          |
|------------|------|----|----------|----------|
| MGST2      | 4.13 | up | 3.70E-08 | 5.04E-08 |
| IL33       | 4.1  | up | 2.00E-07 | 3.51E-07 |
| HOXC9      | 4.1  | up | 5.20E-06 | 6.56E-06 |
| FAIM2      | 4.06 | up | 9.53E-08 | 1.15E-07 |
| FLT1       | 4.05 | up | 4.09E-08 | 5.47E-08 |
| GALNT12    | 4.05 | up | 3.48E-07 | 3.74E-07 |
| ICAM1      | 4.01 | up | 4.57E-09 | 9.56E-09 |
| FIBIN      | 3.96 | up | 5.17E-08 | 6.72E-08 |
| ADAM19     | 3.94 | up | 5.95E-11 | 4.68E-10 |
| IER3       | 3.93 | up | 3.72E-11 | 3.39E-10 |
| TSPAN15    | 3.93 | up | 1.01E-08 | 1.78E-08 |
| CNTNAP3    | 3.86 | up | 1.79E-09 | 4.50E-09 |
| GDF15      | 3.85 | up | 2.96E-08 | 4.26E-08 |
| CNTNAP3    | 3.82 | up | 2.73E-10 | 1.24E-09 |
| HOXC10     | 3.82 | up | 1.36E-08 | 2.20E-08 |
| COL3A1     | 3.79 | up | 1.53E-12 | 1.49E-10 |
| FGD6       | 3.78 | up | 8.91E-08 | 1.09E-07 |
| SLC1A3     | 3.77 | up | 1.15E-10 | 7.39E-10 |
| IER3       | 3.76 | up | 1.40E-10 | 8.14E-10 |
| IER3       | 3.76 | up | 1.40E-10 | 8.14E-10 |
| FRMPD4     | 3.72 | up | 2.00E-07 | 3.51E-07 |
| GSTT2      | 3.71 | up | 4.00E-07 | 4.26E-07 |
| GSTT2      | 3.71 | up | 4.00E-07 | 4.26E-07 |
| VCAM1      | 3.7  | up | 1.96E-08 | 2.96E-08 |
| CXCL5      | 3.7  | up | 1.79E-06 | 1.80E-06 |
| KRT19      | 3.69 | up | 1.05E-07 | 1.26E-07 |
| OLR1       | 3.68 | up | 2.00E-07 | 3.51E-07 |
| MYOCD      | 3.67 | up | 4.41E-10 | 1.71E-09 |
| PDE10A     | 3.67 | up | 1.20E-08 | 2.03E-08 |
| NFKBIZ     | 3.64 | up | 1.57E-08 | 2.47E-08 |
| SPECC1     | 3.63 | up | 3.44E-08 | 4.79E-08 |
| FLJ34690   | 3.62 | up | 1.82E-10 | 9.62E-10 |
| HOXA2      | 3.62 | up | 9.94E-10 | 3.11E-09 |
| ITGB1BP2   | 3.62 | up | 2.22E-08 | 3.30E-08 |
| TRPA1      | 3.62 | up | 5.99E-08 | 7.62E-08 |
| ELOVL2     | 3.58 | up | 8.76E-07 | 8.98E-07 |
| MECOM      | 3.57 | up | 1.22E-07 | 1.45E-07 |
| ST6GALNAC3 | 3.55 | up | 3.68E-09 | 7.99E-09 |
| DCBLD1     | 3.53 | up | 6.21E-10 | 2.19E-09 |
| TMEM2      | 3.51 | up | 5.78E-09 | 1.14E-08 |
| MATN2      | 3.5  | up | 2.38E-07 | 2.63E-07 |
| KIAA1324L  | 3.49 | up | 1.00E-06 | 1.46E-06 |
| SGCG       | 3.49 | up | 1.10E-06 | 1.58E-06 |
| FAM60A     | 3.48 | up | 1.78E-07 | 2.01E-07 |
| PDPN       | 3.48 | up | 2.12E-07 | 2.37E-07 |
| STK33      | 3.44 | up | 1.98E-10 | 1.00E-09 |
| HOXA4      | 3.44 | up | 1.00E-07 | 1.92E-07 |
| SERPINB9   | 3.43 | up | 8.84E-07 | 9.05E-07 |
| C3orf52    | 3.41 | up | 2.26E-09 | 5.50E-09 |
| CD274      | 3.4  | up | 1.00E-07 | 1.92E-07 |
| ENC1       | 3.39 | up | 9.55E-09 | 1.72E-08 |

|          |      |    |          |          |
|----------|------|----|----------|----------|
| TNFAIP6  | 3.34 | up | 1.05E-09 | 3.25E-09 |
| SEL1L3   | 3.31 | up | 4.84E-10 | 1.83E-09 |
| HOXB6    | 3.3  | up | 2.90E-06 | 3.85E-06 |
| FLRT3    | 3.29 | up | 6.93E-10 | 2.41E-09 |
| PTHLH    | 3.29 | up | 5.51E-08 | 7.06E-08 |
| PRICKLE2 | 3.27 | up | 5.90E-08 | 7.53E-08 |
| PHKA1    | 3.26 | up | 5.56E-09 | 1.10E-08 |
| RTN1     | 3.25 | up | 1.00E-07 | 1.92E-07 |
| HAND2    | 3.25 | up | 4.00E-07 | 6.42E-07 |
| TGFBR1   | 3.22 | up | 8.25E-10 | 2.73E-09 |
| WNK4     | 3.21 | up | 2.09E-09 | 5.15E-09 |
| FMNL2    | 3.19 | up | 1.39E-08 | 2.23E-08 |
| ACTBL2   | 3.19 | up | 3.00E-07 | 5.02E-07 |
| C4orf26  | 3.19 | up | 5.00E-07 | 7.84E-07 |
| RASGRP1  | 3.18 | up | 3.75E-10 | 1.55E-09 |
| PLD1     | 3.18 | up | 8.98E-08 | 1.09E-07 |
| CORO2B   | 3.18 | up | 3.00E-07 | 5.02E-07 |
| PITX2    | 3.17 | up | 1.43E-05 | 1.70E-05 |
| DHCR7    | 3.14 | up | 3.67E-09 | 7.98E-09 |
| SIRPA    | 3.14 | up | 2.20E-07 | 2.46E-07 |
| CHD7     | 3.13 | up | 1.19E-09 | 3.45E-09 |
| MGC24103 | 3.13 | up | 1.30E-06 | 1.84E-06 |
| CCND2    | 3.11 | up | 1.00E-07 | 1.92E-07 |
| ITPR2    | 3.11 | up | 1.10E-07 | 1.31E-07 |
| CCDC68   | 3.11 | up | 6.00E-07 | 9.21E-07 |
| XRCC4    | 3.09 | up | 3.22E-09 | 7.19E-09 |
| GATA6    | 3.09 | up | 2.00E-07 | 3.51E-07 |
| HOXB2    | 3.09 | up | 1.00E-06 | 1.46E-06 |
| SORBS1   | 3.08 | up | 1.22E-10 | 7.64E-10 |
| C3orf59  | 3.08 | up | 8.30E-09 | 1.54E-08 |
| PGM2L1   | 3.07 | up | 1.29E-07 | 1.52E-07 |
| ANXA8L1  | 3.05 | up | 1.96E-08 | 2.96E-08 |
| SYT1     | 3.05 | up | 5.21E-08 | 6.75E-08 |
| SNORD56B | 3.05 | up | 1.00E-06 | 1.46E-06 |
| NRK      | 3.05 | up | 2.29E-05 | 2.64E-05 |
| SLC7A7   | 3.04 | up | 7.81E-09 | 1.45E-08 |
| FLNB     | 3.03 | up | 1.74E-11 | 2.38E-10 |
| RGS2     | 3.03 | up | 1.73E-07 | 1.96E-07 |
| VAMP8    | 3.03 | up | 4.00E-07 | 6.42E-07 |
| CCDC85A  | 3.02 | up | 3.30E-06 | 4.34E-06 |
| OGFRL1   | 2.98 | up | 1.70E-09 | 4.38E-09 |
| F11R     | 2.98 | up | 2.00E-07 | 3.51E-07 |
| INHBE    | 2.97 | up | 3.20E-06 | 4.22E-06 |
| DPYSL3   | 2.96 | up | 2.21E-10 | 1.04E-09 |
| NALCN    | 2.96 | up | 3.59E-08 | 4.93E-08 |
| RAB27B   | 2.95 | up | 1.36E-07 | 1.59E-07 |
| HOXA5    | 2.95 | up | 7.00E-07 | 1.06E-06 |
| SLC7A2   | 2.94 | up | 2.00E-07 | 3.51E-07 |
| DUSP5P   | 2.91 | up | 1.28E-05 | 1.52E-05 |
| MYH10    | 2.9  | up | 7.96E-12 | 2.05E-10 |
| SKIL     | 2.89 | up | 6.11E-07 | 6.33E-07 |

|              |      |    |          |          |
|--------------|------|----|----------|----------|
| FLJ38109     | 2.87 | up | 3.50E-08 | 4.85E-08 |
| PLXDC2       | 2.87 | up | 1.57E-07 | 1.81E-07 |
| INHBA        | 2.86 | up | 3.14E-12 | 1.49E-10 |
| DUSP5P       | 2.85 | up | 5.00E-07 | 7.84E-07 |
| ST3GAL1      | 2.83 | up | 3.24E-09 | 7.21E-09 |
| CD55         | 2.81 | up | 3.29E-09 | 7.30E-09 |
| LRIG1        | 2.81 | up | 2.25E-08 | 3.34E-08 |
| LOC100133106 | 2.81 | up | 3.63E-07 | 3.88E-07 |
| MMP16        | 2.8  | up | 3.00E-07 | 5.02E-07 |
| COL11A1      | 2.8  | up | 5.69E-07 | 5.91E-07 |
| TDO2         | 2.8  | up | 9.00E-07 | 1.33E-06 |
| PLD5         | 2.8  | up | 4.70E-06 | 5.99E-06 |
| NFE2L3       | 2.77 | up | 4.04E-07 | 4.29E-07 |
| TGFB2        | 2.76 | up | 1.61E-11 | 2.38E-10 |
| PROCR        | 2.76 | up | 1.05E-08 | 1.85E-08 |
| IRAK3        | 2.76 | up | 1.00E-07 | 1.92E-07 |
| IL32         | 2.76 | up | 3.16E-07 | 3.41E-07 |
| OR51E2       | 2.75 | up | 2.50E-06 | 3.35E-06 |
| MEST         | 2.74 | up | 5.78E-13 | 1.49E-10 |
| MLLT11       | 2.74 | up | 3.19E-11 | 3.25E-10 |
| HOXB9        | 2.74 | up | 1.00E-07 | 1.92E-07 |
| TAGLN3       | 2.74 | up | 8.30E-06 | 1.02E-05 |
| MATN3        | 2.73 | up | 1.80E-06 | 2.48E-06 |
| CYP2S1       | 2.72 | up | 1.13E-09 | 3.41E-09 |
| C3AR1        | 2.72 | up | 2.80E-06 | 3.72E-06 |
| STMN2        | 2.72 | up | 7.01E-05 | 7.82E-05 |
| GPR63        | 2.71 | up | 3.71E-10 | 1.54E-09 |
| CNN1         | 2.71 | up | 1.57E-09 | 4.23E-09 |
| LMCD1        | 2.71 | up | 1.13E-08 | 1.95E-08 |
| B4GALT6      | 2.71 | up | 2.81E-08 | 4.08E-08 |
| ZFPM2        | 2.7  | up | 5.14E-10 | 1.89E-09 |
| ADAMTS9      | 2.69 | up | 3.82E-08 | 5.18E-08 |
| PRDM1        | 2.69 | up | 4.05E-08 | 5.42E-08 |
| TBC1D4       | 2.67 | up | 4.00E-07 | 6.42E-07 |
| FLI1         | 2.66 | up | 1.37E-09 | 3.82E-09 |
| PHLDB2       | 2.66 | up | 1.75E-08 | 2.71E-08 |
| HOXD11       | 2.66 | up | 4.00E-07 | 6.42E-07 |
| COBLL1       | 2.66 | up | 5.44E-07 | 5.67E-07 |
| PAPPA        | 2.66 | up | 7.00E-07 | 1.06E-06 |
| HMCN1        | 2.65 | up | 1.32E-08 | 2.16E-08 |
| SORL1        | 2.64 | up | 5.05E-11 | 4.11E-10 |
| FAM59A       | 2.63 | up | 6.00E-07 | 9.21E-07 |
| MCAM         | 2.62 | up | 7.52E-10 | 2.55E-09 |
| MIR503       | 2.62 | up | 5.00E-07 | 7.84E-07 |
| ODZ2         | 2.62 | up | 1.98E-06 | 1.99E-06 |
| KDR          | 2.62 | up | 3.80E-06 | 4.95E-06 |
| SCARB1       | 2.61 | up | 1.00E-07 | 1.92E-07 |
| HBEGF        | 2.6  | up | 7.27E-11 | 5.41E-10 |
| DFNA5        | 2.6  | up | 4.36E-08 | 5.78E-08 |
| C5orf4       | 2.6  | up | 5.39E-07 | 5.62E-07 |
| IGF2BP1      | 2.59 | up | 9.22E-10 | 2.94E-09 |



|          |      |    |          |          |
|----------|------|----|----------|----------|
| CCDC36   | 2.59 | up | 1.00E-07 | 1.92E-07 |
| CDH4     | 2.58 | up | 1.00E-07 | 1.92E-07 |
| HOXC5    | 2.58 | up | 1.60E-06 | 2.23E-06 |
| ASS1     | 2.57 | up | 5.45E-10 | 1.94E-09 |
| COL4A1   | 2.56 | up | 2.56E-11 | 2.92E-10 |
| CADM1    | 2.56 | up | 1.00E-07 | 1.92E-07 |
| SSTR1    | 2.56 | up | 5.00E-06 | 6.34E-06 |
| BTBD11   | 2.55 | up | 2.00E-07 | 3.51E-07 |
| DAPK1    | 2.55 | up | 1.60E-06 | 2.23E-06 |
| SULT1B1  | 2.54 | up | 9.00E-07 | 1.33E-06 |
| ERAP2    | 2.54 | up | 1.90E-06 | 2.61E-06 |
| CDH2     | 2.53 | up | 3.65E-12 | 1.49E-10 |
| ARHGAP42 | 2.53 | up | 9.52E-09 | 1.72E-08 |
| FKBP5    | 2.53 | up | 4.12E-07 | 4.38E-07 |
| MFAP2    | 2.52 | up | 1.74E-09 | 4.40E-09 |
| PCDH7    | 2.52 | up | 5.41E-09 | 1.08E-08 |
| KDELC1   | 2.52 | up | 1.39E-08 | 2.23E-08 |
| ITGA2    | 2.51 | up | 1.23E-10 | 7.64E-10 |
| EDNRA    | 2.51 | up | 2.76E-07 | 3.02E-07 |
| HOXB3    | 2.51 | up | 1.00E-05 | 1.21E-05 |
| CTH      | 2.5  | up | 3.00E-07 | 5.02E-07 |
| RBM47    | 2.49 | up | 3.17E-10 | 1.41E-09 |
| NCAM1    | 2.49 | up | 8.78E-09 | 1.61E-08 |
| ALOX5AP  | 2.49 | up | 6.00E-07 | 9.21E-07 |
| SLC19A2  | 2.48 | up | 2.00E-07 | 3.51E-07 |
| PELO     | 2.48 | up | 2.00E-07 | 3.51E-07 |
| SERPINB7 | 2.47 | up | 1.00E-07 | 1.92E-07 |
| GALNT10  | 2.45 | up | 6.84E-11 | 5.20E-10 |
| SLC25A23 | 2.45 | up | 1.00E-07 | 1.92E-07 |
| PELI1    | 2.45 | up | 4.00E-06 | 5.17E-06 |
| MSI2     | 2.44 | up | 1.32E-07 | 1.55E-07 |
| HOXB5    | 2.44 | up | 6.00E-07 | 9.21E-07 |
| SPOCK1   | 2.43 | up | 8.83E-12 | 2.05E-10 |
| ZNF462   | 2.43 | up | 2.85E-08 | 4.11E-08 |
| RAB33A   | 2.43 | up | 2.20E-06 | 2.98E-06 |
| ANKRD50  | 2.41 | up | 5.27E-10 | 1.92E-09 |
| LIFR     | 2.41 | up | 5.62E-08 | 7.18E-08 |
| KCNG1    | 2.41 | up | 8.98E-08 | 1.09E-07 |
| PRKY     | 2.4  | up | 1.00E-07 | 1.92E-07 |
| ARHGEF26 | 2.4  | up | 1.20E-06 | 1.71E-06 |
| MCTP1    | 2.4  | up | 1.80E-06 | 2.48E-06 |
| THBS2    | 2.39 | up | 2.31E-12 | 1.49E-10 |
| ADAM12   | 2.39 | up | 3.31E-12 | 1.49E-10 |
| PRSS35   | 2.39 | up | 2.00E-07 | 3.51E-07 |
| SPATS2   | 2.38 | up | 1.90E-10 | 9.83E-10 |
| PTPRE    | 2.38 | up | 3.50E-06 | 4.58E-06 |
| MMP16    | 2.37 | up | 1.67E-09 | 4.34E-09 |
| SLC6A15  | 2.37 | up | 3.10E-06 | 4.10E-06 |
| TMEM133  | 2.36 | up | 3.11E-09 | 7.03E-09 |
| LMO4     | 2.36 | up | 1.65E-08 | 2.58E-08 |
| TAS2R43  | 2.36 | up | 2.00E-07 | 3.51E-07 |

|           |      |    |          |          |
|-----------|------|----|----------|----------|
| IL31RA    | 2.35 | up | 2.40E-06 | 3.24E-06 |
| C16orf74  | 2.35 | up | 1.02E-05 | 1.23E-05 |
| SULF1     | 2.34 | up | 2.83E-12 | 1.49E-10 |
| TMEM144   | 2.34 | up | 2.07E-10 | 1.01E-09 |
| CCL20     | 2.34 | up | 1.20E-06 | 1.71E-06 |
| ZC3H12A   | 2.34 | up | 1.19E-05 | 1.42E-05 |
| C20orf112 | 2.33 | up | 1.00E-07 | 1.92E-07 |
| ARAP2     | 2.33 | up | 1.00E-07 | 1.92E-07 |
| CLTCL1    | 2.32 | up | 8.62E-08 | 1.05E-07 |
| TTLL7     | 2.31 | up | 5.37E-10 | 1.94E-09 |
| HTR1D     | 2.31 | up | 3.42E-09 | 7.52E-09 |
| DDX26B    | 2.3  | up | 1.00E-07 | 1.92E-07 |
| GPC6      | 2.29 | up | 1.39E-10 | 8.14E-10 |
| MCTP2     | 2.29 | up | 6.00E-07 | 9.21E-07 |
| IL6       | 2.28 | up | 8.64E-10 | 2.82E-09 |
| FZD8      | 2.28 | up | 2.00E-07 | 3.51E-07 |
| SNORD109A | 2.28 | up | 5.10E-06 | 6.44E-06 |
| SNORD109A | 2.28 | up | 5.10E-06 | 6.44E-06 |
| MIR181A2  | 2.28 | up | 3.18E-05 | 3.63E-05 |
| GOPC      | 2.27 | up | 5.01E-11 | 4.11E-10 |
| ADAM23    | 2.27 | up | 8.05E-08 | 9.91E-08 |
| KIAA1598  | 2.27 | up | 1.00E-07 | 1.92E-07 |
| MMP1      | 2.27 | up | 1.00E-07 | 1.92E-07 |
| LMO3      | 2.27 | up | 1.40E-06 | 1.97E-06 |
| SCG5      | 2.26 | up | 1.00E-07 | 1.92E-07 |
| LOH3CR2A  | 2.26 | up | 8.00E-07 | 1.19E-06 |
| PAR5      | 2.26 | up | 1.40E-06 | 1.97E-06 |
| KCNG1     | 2.26 | up | 5.80E-06 | 7.27E-06 |
| KGFLP2    | 2.25 | up | 2.07E-10 | 1.01E-09 |
| COL25A1   | 2.24 | up | 3.40E-06 | 4.46E-06 |
| ETS2      | 2.23 | up | 1.08E-10 | 7.14E-10 |
| LIMS3     | 2.23 | up | 1.52E-10 | 8.41E-10 |
| LIMS3     | 2.23 | up | 1.52E-10 | 8.41E-10 |
| VEPH1     | 2.23 | up | 4.73E-09 | 9.74E-09 |
| MID2      | 2.23 | up | 4.00E-07 | 6.42E-07 |
| PTPRF     | 2.22 | up | 1.34E-10 | 8.09E-10 |
| CDCA7L    | 2.22 | up | 3.16E-08 | 4.47E-08 |
| FSD1      | 2.22 | up | 1.04E-07 | 1.24E-07 |
| IL4R      | 2.22 | up | 1.70E-07 | 1.94E-07 |
| IGSF10    | 2.22 | up | 6.50E-06 | 8.10E-06 |
| HIVEP3    | 2.21 | up | 3.03E-08 | 4.31E-08 |
| EGF       | 2.21 | up | 2.10E-06 | 2.86E-06 |
| WDR69     | 2.2  | up | 5.00E-07 | 7.84E-07 |
| SSPN      | 2.2  | up | 4.80E-06 | 6.11E-06 |
| NAMPT     | 2.19 | up | 1.68E-10 | 9.01E-10 |
| SNCA      | 2.19 | up | 4.38E-07 | 4.63E-07 |
| SIK1      | 2.19 | up | 2.10E-06 | 2.86E-06 |
| NNMT      | 2.16 | up | 7.51E-12 | 2.05E-10 |
| BNC2      | 2.16 | up | 4.42E-10 | 1.71E-09 |
| SAT1      | 2.16 | up | 2.58E-09 | 6.06E-09 |
| ACCN2     | 2.16 | up | 7.00E-07 | 1.06E-06 |

|              |      |    |           |          |
|--------------|------|----|-----------|----------|
| FAM27E3      | 2.16 | up | 3.40E-06  | 4.46E-06 |
| MEIS2        | 2.15 | up | 4.00E-07  | 6.42E-07 |
| TMEM132A     | 2.15 | up | 4.90E-06  | 6.23E-06 |
| RHBDF2       | 2.15 | up | 1.02E-05  | 1.23E-05 |
| EAF2         | 2.15 | up | 2.45E-05  | 2.82E-05 |
| MET          | 2.14 | up | 1.00E-07  | 1.92E-07 |
| MST4         | 2.14 | up | 2.00E-07  | 3.51E-07 |
| BAIAP2L1     | 2.14 | up | 6.00E-07  | 9.21E-07 |
| CXCL2        | 2.14 | up | 9.10E-06  | 1.11E-05 |
| XYLT1        | 2.13 | up | 7.07E-11  | 5.32E-10 |
| TNFRSF10A    | 2.13 | up | 1.64E-10  | 8.86E-10 |
| TRIM24       | 2.13 | up | 3.55E-09  | 7.76E-09 |
| BHLHE40      | 2.13 | up | 3.00E-07  | 5.02E-07 |
| HSPA2        | 2.13 | up | 1.90E-06  | 2.61E-06 |
| ACTG2        | 2.12 | up | 1.46E-12  | 1.49E-10 |
| FABP4        | 2.12 | up | 1.30E-11  | 2.22E-10 |
| IKBKE        | 2.12 | up | 1.00E-07  | 1.92E-07 |
| ODZ4         | 2.12 | up | 1.00E-07  | 1.92E-07 |
| ACVR2A       | 2.12 | up | 1.00E-07  | 1.92E-07 |
| CACNG7       | 2.12 | up | 2.70E-06  | 3.60E-06 |
| JPH1         | 2.12 | up | 6.30E-06  | 7.88E-06 |
| CLDN11       | 2.11 | up | 9.81E-12  | 2.12E-10 |
| CCDC8        | 2.11 | up | 1.00E-07  | 1.92E-07 |
| IL1RAP       | 2.11 | up | 7.00E-07  | 1.06E-06 |
| NAMPT        | 2.1  | up | 4.71E-11  | 3.98E-10 |
| OSBPL6       | 2.1  | up | 3.66E-08  | 5.00E-08 |
| QPCT         | 2.1  | up | 1.00E-07  | 1.92E-07 |
| GBGT1        | 2.1  | up | 1.00E-07  | 1.92E-07 |
| GALNTL4      | 2.1  | up | 2.00E-07  | 3.51E-07 |
| FRY          | 2.09 | up | 3.16E-09  | 7.10E-09 |
| COL4A2       | 2.09 | up | 1.00E-07  | 1.92E-07 |
| COL4A5       | 2.09 | up | 1.00E-07  | 1.92E-07 |
| FAM27E3      | 2.09 | up | 1.30E-06  | 1.84E-06 |
| KLHL4        | 2.09 | up | 3.90E-06  | 5.06E-06 |
| CSNK1D       | 2.09 | up | 5.30E-06  | 6.67E-06 |
| ATP2C1       | 2.08 | up | 1.44E-10  | 8.23E-10 |
| ELTD1        | 2.08 | up | 2.04E-09  | 5.04E-09 |
| STAT5B       | 2.08 | up | 1.87E-07  | 2.10E-07 |
| LOC100131541 | 2.08 | up | 2.00E-07  | 3.51E-07 |
| STARD4       | 2.08 | up | 2.00E-07  | 3.51E-07 |
| RRP7B        | 2.08 | up | 8.00E-07  | 1.19E-06 |
| FAM27E3      | 2.08 | up | 8.00E-07  | 1.19E-06 |
| CHST1        | 2.08 | up | 1.20E-06  | 1.71E-06 |
| SNORD30      | 2.08 | up | 8.30E-06  | 1.02E-05 |
| SFXN2        | 2.07 | up | 1.00E-07  | 1.92E-07 |
| GAB2         | 2.07 | up | 1.00E-07  | 1.92E-07 |
| NDN          | 2.07 | up | 5.00E-07  | 7.84E-07 |
| PPYR1        | 2.07 | up | 3.00E-06  | 3.97E-06 |
| FAM84B       | 2.07 | up | 2.13E-05  | 2.48E-05 |
| LYPD1        | 2.07 | up | 0.0001246 | 0.000136 |
| GPAM         | 2.06 | up | 1.00E-07  | 1.92E-07 |

|             |      |    |           |          |
|-------------|------|----|-----------|----------|
| VLDLR       | 2.06 | up | 1.00E-07  | 1.92E-07 |
| MIR181B1    | 2.06 | up | 2.10E-06  | 2.86E-06 |
| MIR143      | 2.06 | up | 0.0004494 | 0.000474 |
| GXYLT2      | 2.05 | up | 4.02E-09  | 8.54E-09 |
| ATP2B1      | 2.05 | up | 1.00E-07  | 1.92E-07 |
| JHDM1D      | 2.05 | up | 1.00E-07  | 1.92E-07 |
| APBB2       | 2.04 | up | 4.52E-12  | 1.74E-10 |
| SNORD116-21 | 2.04 | up | 1.60E-06  | 2.23E-06 |
| PP13439     | 2.04 | up | 1.80E-05  | 2.11E-05 |
| KCTD16      | 2.03 | up | 1.00E-07  | 1.92E-07 |
| KCNAB1      | 2.03 | up | 3.00E-07  | 5.02E-07 |
| ANXA8       | 2.02 | up | 2.82E-10  | 1.28E-09 |
| SLC38A1     | 2.02 | up | 1.00E-07  | 1.92E-07 |
| CSGALNACT1  | 2.02 | up | 2.85E-07  | 3.10E-07 |
| ETNK2       | 2.02 | up | 7.00E-07  | 1.06E-06 |
| ALDH1B1     | 2.01 | up | 4.10E-11  | 3.59E-10 |
| HYI         | 2.01 | up | 1.20E-10  | 7.64E-10 |
| C1QTNF1     | 2.01 | up | 1.08E-08  | 1.89E-08 |
| NETO2       | 2.01 | up | 1.00E-07  | 1.92E-07 |
| MIR146A     | 2    | up | 1.46E-05  | 1.73E-05 |
| SCD         | 2    | up | 9.86E-05  | 0.000109 |
| FAM46A      | 1.99 | up | 1.59E-10  | 8.66E-10 |
| GRAMD1C     | 1.99 | up | 3.30E-06  | 4.34E-06 |
| MPZL3       | 1.99 | up | 4.40E-06  | 5.65E-06 |
| ITGA4       | 1.98 | up | 1.00E-07  | 1.92E-07 |
| NFATC2      | 1.98 | up | 1.00E-07  | 1.92E-07 |
| UCHL1       | 1.98 | up | 1.00E-07  | 1.92E-07 |
| MGC16121    | 1.98 | up | 8.30E-06  | 1.02E-05 |
| HOXD8       | 1.98 | up | 2.77E-05  | 3.17E-05 |
| FERMT1      | 1.98 | up | 3.91E-05  | 4.43E-05 |
| CDK15       | 1.97 | up | 1.00E-07  | 1.92E-07 |
| KIAA0922    | 1.97 | up | 1.00E-07  | 1.92E-07 |
| SLC16A9     | 1.97 | up | 1.16E-05  | 1.39E-05 |
| CSRP2       | 1.97 | up | 7.32E-05  | 8.16E-05 |
| ANXA8L2     | 1.96 | up | 2.85E-11  | 2.98E-10 |
| KLHL5       | 1.96 | up | 2.69E-09  | 6.26E-09 |
| COL5A2      | 1.96 | up | 1.00E-07  | 1.92E-07 |
| TFRC        | 1.96 | up | 1.00E-07  | 1.92E-07 |
| LRRTM3      | 1.96 | up | 6.00E-07  | 9.21E-07 |
| CCDC122     | 1.96 | up | 8.00E-07  | 1.19E-06 |
| DNAJB9      | 1.96 | up | 6.60E-06  | 8.20E-06 |
| CD24        | 1.95 | up | 1.00E-07  | 1.92E-07 |
| PKDCC       | 1.95 | up | 2.00E-07  | 3.51E-07 |
| MSC         | 1.95 | up | 2.00E-07  | 3.51E-07 |
| PIK3C2B     | 1.95 | up | 5.00E-07  | 7.84E-07 |
| PTPRU       | 1.95 | up | 6.00E-07  | 9.21E-07 |
| CDA         | 1.95 | up | 6.90E-06  | 8.52E-06 |
| P2RX1       | 1.95 | up | 1.66E-05  | 1.96E-05 |
| DNAJC12     | 1.94 | up | 1.80E-06  | 2.48E-06 |
| BCHE        | 1.94 | up | 2.50E-06  | 3.35E-06 |
| CTHRC1      | 1.93 | up | 5.21E-10  | 1.91E-09 |

|          |      |    |           |          |
|----------|------|----|-----------|----------|
| PEG10    | 1.93 | up | 1.00E-07  | 1.92E-07 |
| PTCH1    | 1.93 | up | 1.00E-07  | 1.92E-07 |
| DIP2B    | 1.93 | up | 3.00E-07  | 5.02E-07 |
| SLC38A4  | 1.93 | up | 1.20E-06  | 1.71E-06 |
| ENTPD7   | 1.92 | up | 1.08E-09  | 3.29E-09 |
| MIR21    | 1.92 | up | 1.40E-06  | 1.97E-06 |
| SNRPN    | 1.92 | up | 5.20E-06  | 6.56E-06 |
| MLXIP    | 1.91 | up | 2.41E-09  | 5.79E-09 |
| FILIP1L  | 1.91 | up | 2.00E-07  | 3.51E-07 |
| SLC4A3   | 1.91 | up | 5.30E-06  | 6.67E-06 |
| STGC3    | 1.91 | up | 2.07E-05  | 2.42E-05 |
| ARHGAP28 | 1.91 | up | 2.69E-05  | 3.08E-05 |
| QPRT     | 1.91 | up | 0.0001291 | 0.000141 |
| UTS2D    | 1.91 | up | 0.0004467 | 0.000472 |
| DYSF     | 1.9  | up | 1.00E-07  | 1.92E-07 |
| FAR2     | 1.9  | up | 3.00E-07  | 5.02E-07 |
| GYPC     | 1.9  | up | 3.00E-07  | 5.02E-07 |
| GPR125   | 1.9  | up | 5.00E-07  | 7.84E-07 |
| SNORA38B | 1.9  | up | 4.00E-06  | 5.17E-06 |
| POLR3G   | 1.9  | up | 4.70E-06  | 5.99E-06 |
| LYPD6    | 1.89 | up | 1.00E-07  | 1.92E-07 |
| CRISPLD2 | 1.89 | up | 2.00E-07  | 3.51E-07 |
| MAN2A1   | 1.89 | up | 2.00E-07  | 3.51E-07 |
| INSIG1   | 1.89 | up | 3.00E-07  | 5.02E-07 |
| FGF7     | 1.89 | up | 1.80E-06  | 2.48E-06 |
| FAM117B  | 1.89 | up | 1.10E-05  | 1.32E-05 |
| LIPG     | 1.89 | up | 0.0001058 | 0.000117 |
| AGRN     | 1.88 | up | 1.00E-07  | 1.92E-07 |
| IQCB1    | 1.88 | up | 2.00E-07  | 3.51E-07 |
| CLCN5    | 1.88 | up | 1.60E-06  | 2.23E-06 |
| SPP1     | 1.88 | up | 4.40E-06  | 5.65E-06 |
| DDIT4L   | 1.88 | up | 2.76E-05  | 3.16E-05 |
| DUSP4    | 1.88 | up | 9.49E-05  | 0.000105 |
| HAS2     | 1.87 | up | 1.75E-11  | 2.38E-10 |
| NAV1     | 1.87 | up | 2.00E-07  | 3.51E-07 |
| TANC1    | 1.87 | up | 2.00E-07  | 3.51E-07 |
| ARHGAP20 | 1.87 | up | 8.00E-07  | 1.19E-06 |
| COTL1    | 1.87 | up | 8.00E-07  | 1.19E-06 |
| ODC1     | 1.87 | up | 4.30E-06  | 5.53E-06 |
| LIF      | 1.86 | up | 1.00E-07  | 1.92E-07 |
| SSBP3    | 1.86 | up | 4.00E-07  | 6.42E-07 |
| HSPB6    | 1.86 | up | 7.00E-07  | 1.06E-06 |
| TSKU     | 1.86 | up | 8.00E-07  | 1.19E-06 |
| FBLIM1   | 1.86 | up | 5.00E-06  | 6.34E-06 |
| PRR5L    | 1.86 | up | 1.01E-05  | 1.22E-05 |
| SLC7A5   | 1.85 | up | 2.29E-12  | 1.49E-10 |
| DDIT4    | 1.85 | up | 1.00E-07  | 1.92E-07 |
| ETV6     | 1.85 | up | 1.00E-07  | 1.92E-07 |
| PDIA5    | 1.85 | up | 1.00E-07  | 1.92E-07 |
| AGPAT4   | 1.85 | up | 1.00E-07  | 1.92E-07 |
| AVEN     | 1.85 | up | 1.00E-06  | 1.46E-06 |

|              |      |    |           |          |
|--------------|------|----|-----------|----------|
| ATP2A3       | 1.85 | up | 1.20E-06  | 1.71E-06 |
| C7orf54      | 1.85 | up | 1.80E-06  | 2.48E-06 |
| RNFT2        | 1.85 | up | 2.20E-06  | 2.98E-06 |
| NTRK3        | 1.85 | up | 2.21E-05  | 2.56E-05 |
| SNORD116-29  | 1.85 | up | 7.61E-05  | 8.47E-05 |
| SSX2IP       | 1.84 | up | 1.00E-07  | 1.92E-07 |
| FAM13A       | 1.84 | up | 1.00E-07  | 1.92E-07 |
| TRIB1        | 1.84 | up | 1.00E-07  | 1.92E-07 |
| DOCK2        | 1.84 | up | 3.00E-07  | 5.02E-07 |
| CAMK1D       | 1.84 | up | 2.60E-06  | 3.47E-06 |
| TNFSF4       | 1.84 | up | 3.90E-06  | 5.06E-06 |
| ZFP57        | 1.84 | up | 2.10E-05  | 2.45E-05 |
| LOC100132099 | 1.84 | up | 8.19E-05  | 9.10E-05 |
| PAPSS2       | 1.83 | up | 1.00E-07  | 1.92E-07 |
| PLTP         | 1.83 | up | 1.00E-07  | 1.92E-07 |
| RAI14        | 1.83 | up | 1.00E-07  | 1.92E-07 |
| TGFB1        | 1.83 | up | 1.00E-07  | 1.92E-07 |
| TFPI2        | 1.83 | up | 1.00E-07  | 1.92E-07 |
| LOC645166    | 1.83 | up | 2.00E-07  | 3.51E-07 |
| HIVEP2       | 1.83 | up | 3.00E-07  | 5.02E-07 |
| SNORD116-26  | 1.83 | up | 5.00E-07  | 7.84E-07 |
| LHFPL2       | 1.83 | up | 2.00E-06  | 2.74E-06 |
| HOXA1        | 1.83 | up | 8.20E-06  | 1.01E-05 |
| SNORD116-11  | 1.83 | up | 5.01E-05  | 5.64E-05 |
| ANTXR1       | 1.82 | up | 1.00E-07  | 1.92E-07 |
| ROR1         | 1.82 | up | 3.00E-07  | 5.02E-07 |
| TRAF5        | 1.82 | up | 3.00E-07  | 5.02E-07 |
| SCN9A        | 1.82 | up | 4.00E-07  | 6.42E-07 |
| SLC10A7      | 1.82 | up | 4.00E-07  | 6.42E-07 |
| ZNF618       | 1.82 | up | 8.90E-06  | 1.09E-05 |
| ABTB2        | 1.82 | up | 1.30E-05  | 1.55E-05 |
| TNS1         | 1.81 | up | 1.82E-11  | 2.38E-10 |
| MAP3K8       | 1.81 | up | 1.20E-06  | 1.71E-06 |
| SYT15        | 1.81 | up | 1.50E-06  | 2.10E-06 |
| NCRNA00185   | 1.81 | up | 0.0002317 | 0.000249 |
| PLOD2        | 1.8  | up | 1.00E-07  | 1.92E-07 |
| PTPRJ        | 1.8  | up | 4.00E-07  | 6.42E-07 |
| GLS          | 1.8  | up | 4.00E-07  | 6.42E-07 |
| GPR125       | 1.8  | up | 9.00E-07  | 1.33E-06 |
| TTYH2        | 1.8  | up | 1.00E-06  | 1.46E-06 |
| GSDMB        | 1.8  | up | 1.17E-05  | 1.40E-05 |
| GLIPR2       | 1.79 | up | 1.00E-07  | 1.92E-07 |
| BMPER        | 1.79 | up | 3.00E-07  | 5.02E-07 |
| BAMBI        | 1.79 | up | 2.80E-06  | 3.72E-06 |
| SNORD51      | 1.79 | up | 1.76E-05  | 2.07E-05 |
| PPP1R13B     | 1.78 | up | 1.00E-07  | 1.92E-07 |
| KCNE4        | 1.78 | up | 2.00E-07  | 3.51E-07 |
| SMAD1        | 1.78 | up | 2.00E-07  | 3.51E-07 |
| C4orf49      | 1.78 | up | 3.00E-07  | 5.02E-07 |
| SUPT3H       | 1.78 | up | 3.00E-07  | 5.02E-07 |
| C7orf68      | 1.78 | up | 3.00E-07  | 5.02E-07 |

|              |      |    |           |          |
|--------------|------|----|-----------|----------|
| GLIS3        | 1.78 | up | 3.00E-07  | 5.02E-07 |
| NCAM2        | 1.78 | up | 1.60E-06  | 2.23E-06 |
| GSTO2        | 1.78 | up | 0.0001443 | 0.000157 |
| MIR492       | 1.78 | up | 0.0005005 | 0.000527 |
| CAMK2A       | 1.77 | up | 1.00E-07  | 1.92E-07 |
| PGM2         | 1.77 | up | 3.00E-07  | 5.02E-07 |
| MCC          | 1.77 | up | 2.90E-06  | 3.85E-06 |
| RPP25        | 1.77 | up | 3.90E-06  | 5.06E-06 |
| DES          | 1.77 | up | 2.44E-05  | 2.81E-05 |
| LOC100287290 | 1.77 | up | 0.0001331 | 0.000145 |
| OCIAD2       | 1.76 | up | 3.00E-07  | 5.02E-07 |
| EDEM2        | 1.76 | up | 5.00E-07  | 7.84E-07 |
| AACS         | 1.76 | up | 2.10E-06  | 2.86E-06 |
| LOC375295    | 1.76 | up | 2.20E-06  | 2.98E-06 |
| HOXB7        | 1.76 | up | 1.44E-05  | 1.71E-05 |
| GLCE         | 1.75 | up | 1.00E-07  | 1.92E-07 |
| SEMA3D       | 1.75 | up | 3.00E-07  | 5.02E-07 |
| NFKB1        | 1.75 | up | 9.00E-07  | 1.33E-06 |
| MIR181B2     | 1.75 | up | 1.40E-06  | 1.97E-06 |
| MIR137       | 1.75 | up | 1.90E-06  | 2.61E-06 |
| PDE11A       | 1.75 | up | 3.90E-06  | 5.06E-06 |
| ERN1         | 1.75 | up | 5.04E-05  | 5.67E-05 |
| C10orf58     | 1.75 | up | 0.0001015 | 0.000112 |
| SGPL1        | 1.74 | up | 4.00E-07  | 6.42E-07 |
| GABRE        | 1.74 | up | 5.00E-07  | 7.84E-07 |
| HYOU1        | 1.74 | up | 6.00E-07  | 9.21E-07 |
| RNF122       | 1.74 | up | 8.00E-07  | 1.19E-06 |
| CORO1A       | 1.74 | up | 6.70E-06  | 8.29E-06 |
| C1D          | 1.74 | up | 9.40E-06  | 1.15E-05 |
| F2RL1        | 1.74 | up | 1.57E-05  | 1.86E-05 |
| RHOF         | 1.74 | up | 2.49E-05  | 2.86E-05 |
| ATP7B        | 1.74 | up | 3.30E-05  | 3.76E-05 |
| SNORD114-26  | 1.73 | up | 6.40E-06  | 7.98E-06 |
| NEU1         | 1.72 | up | 9.70E-06  | 1.18E-05 |
| GDPD1        | 1.72 | up | 0.0001382 | 0.000151 |
| POU2F2       | 1.71 | up | 9.00E-07  | 1.33E-06 |
| NR2F2        | 1.71 | up | 4.70E-06  | 5.99E-06 |
| AMPD3        | 1.71 | up | 5.90E-06  | 7.39E-06 |
| GATA4        | 1.71 | up | 1.58E-05  | 1.87E-05 |
| CEP170       | 1.7  | up | 1.80E-06  | 2.48E-06 |
| SNORD13P2    | 1.7  | up | 1.11E-05  | 1.33E-05 |
| LOC151009    | 1.7  | up | 0.0001582 | 0.000172 |
| TRIM61       | 1.7  | up | 0.0002884 | 0.000307 |
| SLC5A3       | 1.69 | up | 1.30E-06  | 1.84E-06 |
| FRMD5        | 1.69 | up | 1.80E-06  | 2.48E-06 |
| NEU1         | 1.69 | up | 4.70E-06  | 5.99E-06 |
| NEU1         | 1.69 | up | 4.70E-06  | 5.99E-06 |
| FAM101A      | 1.69 | up | 2.27E-05  | 2.62E-05 |
| KIR2DL3      | 1.69 | up | 0.0011945 | 0.00124  |
| LRP12        | 1.68 | up | 8.00E-07  | 1.19E-06 |
| SOD2         | 1.68 | up | 1.60E-06  | 2.23E-06 |

|                |      |    |           |          |
|----------------|------|----|-----------|----------|
| TOX2           | 1.68 | up | 1.07E-05  | 1.29E-05 |
| FLJ35409       | 1.68 | up | 1.09E-05  | 1.31E-05 |
| SNORD104       | 1.68 | up | 0.0002387 | 0.000256 |
| PDK3           | 1.68 | up | 0.000243  | 0.000261 |
| SLC12A7        | 1.68 | up | 0.0003825 | 0.000406 |
| SNORD116-1     | 1.68 | up | 0.0009964 | 0.00104  |
| CCDC144B       | 1.67 | up | 6.90E-06  | 8.52E-06 |
| GAB3           | 1.67 | up | 2.17E-05  | 2.52E-05 |
| LOC389607      | 1.67 | up | 6.24E-05  | 6.99E-05 |
| ZNF334         | 1.67 | up | 8.47E-05  | 9.39E-05 |
| TYRP1          | 1.66 | up | 8.20E-05  | 9.11E-05 |
| ABCG1          | 1.66 | up | 9.95E-05  | 0.00011  |
| PITX1          | 1.65 | up | 1.25E-05  | 1.49E-05 |
| BST2           | 1.65 | up | 0.0001532 | 0.000167 |
| SNORD116-23    | 1.65 | up | 0.0001802 | 0.000195 |
| DPY19L2P1      | 1.65 | up | 0.0002702 | 0.000289 |
| RRS1           | 1.64 | up | 2.30E-05  | 2.65E-05 |
| BACH2          | 1.63 | up | 6.80E-06  | 8.41E-06 |
| FAM113B        | 1.63 | up | 1.97E-05  | 2.31E-05 |
| SNORD116-25    | 1.63 | up | 0.0002766 | 0.000295 |
| FLJ31958       | 1.63 | up | 0.0008798 | 0.000919 |
| SNORA64        | 1.63 | up | 0.0055199 | 0.00567  |
| ACSL3          | 1.62 | up | 1.84E-05  | 2.16E-05 |
| PTPRB          | 1.62 | up | 2.48E-05  | 2.85E-05 |
| CRISPLD1       | 1.62 | up | 0.0001634 | 0.000177 |
| PTPRH          | 1.62 | up | 0.0004238 | 0.000448 |
| LOC100288884   | 1.62 | up | 0.0004314 | 0.000456 |
| MED10          | 1.62 | up | 0.0163648 | 0.0166   |
| SKAP2          | 1.61 | up | 4.68E-05  | 5.29E-05 |
| NPPB           | 1.61 | up | 0.000323  | 0.000344 |
| SNORA42        | 1.6  | up | 0.0018564 | 0.00193  |
| SNORD116-8     | 1.6  | up | 0.002204  | 0.00228  |
| FAM99A         | 1.6  | up | 0.0079664 | 0.00817  |
| ZNF286A        | 1.59 | up | 1.07E-05  | 1.29E-05 |
| DKFZp686O24166 | 1.59 | up | 2.81E-05  | 3.21E-05 |
| P2RX5          | 1.58 | up | 4.29E-05  | 4.86E-05 |
| KIF26B         | 1.58 | up | 0.0001832 | 0.000198 |
| FAM118A        | 1.57 | up | 2.01E-05  | 2.35E-05 |
| MOBKL2B        | 1.57 | up | 0.0001141 | 0.000125 |
| C21orf82       | 1.57 | up | 0.0020654 | 0.00214  |
| MBP            | 1.56 | up | 2.03E-05  | 2.37E-05 |
| IL2RB          | 1.56 | up | 0.0003118 | 0.000332 |
| PECR           | 1.56 | up | 0.0034959 | 0.00361  |
| CCDC85C        | 1.55 | up | 0.0001294 | 0.000141 |
| IL11           | 1.54 | up | 0.0001833 | 0.000198 |
| STOX2          | 1.54 | up | 0.0006753 | 0.000708 |
| LOC642947      | 1.53 | up | 0.0006459 | 0.000678 |
| SNORD116-14    | 1.53 | up | 0.0007003 | 0.000733 |
| SNORD116-5     | 1.53 | up | 0.0019405 | 0.00201  |
| SNORD116-5     | 1.53 | up | 0.0019405 | 0.00201  |
| ZNF778         | 1.52 | up | 0.0003924 | 0.000416 |



|              |      |      |           |          |
|--------------|------|------|-----------|----------|
| SOX5         | 1.52 | up   | 0.0012831 | 0.00134  |
| C1QTNF9B     | 1.52 | up   | 0.0155258 | 0.0158   |
| C6orf168     | 1.51 | up   | 0.0001015 | 0.000112 |
| SNORD116-3   | 1.51 | up   | 0.0039971 | 0.00412  |
| SNORD116-3   | 1.51 | up   | 0.0039971 | 0.00412  |
| SNORD116-22  | 1.49 | up   | 0.0328817 | 0.0334   |
| C15orf48     | 1.48 | up   | 0.0006852 | 0.000718 |
| SNORD25      | 1.48 | up   | 0.0019138 | 0.00199  |
| CDKL2        | 1.47 | up   | 0.0021598 | 0.00224  |
| LILRA3       | 1.45 | up   | 0.0018006 | 0.00187  |
| SNORD116-6   | 1.41 | up   | 0.021175  | 0.0215   |
| ARL9         | 1.39 | up   | 0.0033109 | 0.00342  |
| SNORD116-20  | 1.39 | up   | 0.0105466 | 0.0108   |
| OR10P1       | 1.37 | up   | 0.0086043 | 0.00881  |
| SNRPA1       | 1.37 | up   | 0.0125503 | 0.0128   |
| PHLDB2       | 1.35 | up   | 0.0045467 | 0.00467  |
| FAM38A       | 1.35 | up   | 0.0251805 | 0.0256   |
| NUDT4        | 1.33 | up   | 0.0037365 | 0.00385  |
| C10orf2      | 1.33 | up   | 0.0083577 | 0.00857  |
| ZNF552       | 1.33 | up   | 0.0448467 | 0.0454   |
| ZNF674       | 1.31 | up   | 0.0427219 | 0.0433   |
| ARHGAP23     | 0.76 | down | 0.0250174 | 0.0254   |
| NYNRIN       | 0.75 | down | 0.0128421 | 0.0131   |
| LOC150527    | 0.75 | down | 0.0387303 | 0.0393   |
| LOC150527    | 0.75 | down | 0.0387303 | 0.0393   |
| ZFP14        | 0.74 | down | 0.0095124 | 0.00973  |
| ZNF501       | 0.73 | down | 0.0047724 | 0.0049   |
| PSG8         | 0.73 | down | 0.0139864 | 0.0142   |
| ARHGAP6      | 0.72 | down | 0.0024458 | 0.00253  |
| RBMV2EP      | 0.72 | down | 0.0096447 | 0.00986  |
| HIST1H2BC    | 0.72 | down | 0.0452087 | 0.0457   |
| ROMO1        | 0.71 | down | 0.000705  | 0.000738 |
| METTL7B      | 0.71 | down | 0.0065999 | 0.00677  |
| RPPH1        | 0.7  | down | 0.0025459 | 0.00263  |
| UBQLN4       | 0.7  | down | 0.0108219 | 0.011    |
| DEPDC4       | 0.69 | down | 0.0019515 | 0.00202  |
| LOC349196    | 0.68 | down | 0.0001834 | 0.000198 |
| TEX15        | 0.68 | down | 0.0008029 | 0.000839 |
| LOC100129503 | 0.68 | down | 0.0086454 | 0.00885  |
| PAQR5        | 0.67 | down | 6.74E-05  | 7.54E-05 |
| SPEF2        | 0.67 | down | 0.0002794 | 0.000298 |
| FAM38B       | 0.66 | down | 0.0001575 | 0.000171 |
| OASL         | 0.66 | down | 0.0003915 | 0.000415 |
| GPCRLTM7     | 0.66 | down | 0.0004069 | 0.000431 |
| PRKG2        | 0.66 | down | 0.0011871 | 0.00124  |
| ANKS1B       | 0.65 | down | 0.0001862 | 0.000201 |
| IL11RA       | 0.65 | down | 0.0002685 | 0.000287 |
| AVPI1        | 0.65 | down | 0.0003237 | 0.000344 |
| SEMA3E       | 0.64 | down | 7.70E-05  | 8.56E-05 |
| AREG         | 0.64 | down | 0.0001143 | 0.000125 |
| PLGLA        | 0.64 | down | 0.0002509 | 0.000269 |

|           |      |      |           |          |
|-----------|------|------|-----------|----------|
| INMT      | 0.64 | down | 0.0004121 | 0.000436 |
| KIR3DL1   | 0.64 | down | 0.0042832 | 0.00441  |
| KBTBD7    | 0.63 | down | 2.17E-05  | 2.52E-05 |
| OR10A6    | 0.63 | down | 0.0002446 | 0.000262 |
| METTL7A   | 0.63 | down | 0.0002937 | 0.000313 |
| ADRA1D    | 0.63 | down | 0.0004532 | 0.000478 |
| TYW1B     | 0.63 | down | 0.0040619 | 0.00418  |
| ACSL5     | 0.62 | down | 2.00E-06  | 2.74E-06 |
| LOC349196 | 0.62 | down | 7.20E-06  | 8.88E-06 |
| C4orf46   | 0.62 | down | 8.80E-06  | 1.08E-05 |
| FAM26E    | 0.62 | down | 1.06E-05  | 1.28E-05 |
| AP1S2     | 0.62 | down | 2.65E-05  | 3.04E-05 |
| FBLN7     | 0.62 | down | 2.90E-05  | 3.31E-05 |
| C17orf48  | 0.62 | down | 6.90E-05  | 7.70E-05 |
| CDC6      | 0.62 | down | 0.0001166 | 0.000128 |
| KCNJ2     | 0.62 | down | 0.0001463 | 0.000159 |
| ISM1      | 0.62 | down | 0.0001785 | 0.000193 |
| HIST2H2AC | 0.62 | down | 0.0006231 | 0.000655 |
| ZNF826P   | 0.62 | down | 0.0011594 | 0.00121  |
| C21orf15  | 0.62 | down | 0.0013974 | 0.00145  |
| SOCS3     | 0.61 | down | 5.30E-06  | 6.67E-06 |
| LY6K      | 0.61 | down | 6.40E-06  | 7.98E-06 |
| HIST1H2BN | 0.61 | down | 8.70E-06  | 1.07E-05 |
| PHYH      | 0.61 | down | 1.07E-05  | 1.29E-05 |
| MAP2      | 0.61 | down | 1.17E-05  | 1.40E-05 |
| MAPK10    | 0.61 | down | 2.22E-05  | 2.57E-05 |
| APOL1     | 0.61 | down | 3.58E-05  | 4.07E-05 |
| ERMN      | 0.61 | down | 4.97E-05  | 5.60E-05 |
| C15orf51  | 0.61 | down | 5.51E-05  | 6.18E-05 |
| C15orf51  | 0.61 | down | 5.51E-05  | 6.18E-05 |
| PIGZ      | 0.61 | down | 9.37E-05  | 0.000104 |
| NOVA1     | 0.61 | down | 0.0001104 | 0.000121 |
| GPC3      | 0.61 | down | 0.0001671 | 0.000181 |
| DCHS1     | 0.61 | down | 0.000232  | 0.000249 |
| AKR1C1    | 0.61 | down | 0.0007571 | 0.000792 |
| FLJ30064  | 0.6  | down | 3.40E-06  | 4.46E-06 |
| ENOX1     | 0.6  | down | 1.09E-05  | 1.31E-05 |
| SIX4      | 0.6  | down | 1.14E-05  | 1.37E-05 |
| TECR      | 0.6  | down | 1.60E-05  | 1.89E-05 |
| ECM2      | 0.6  | down | 2.11E-05  | 2.46E-05 |
| ARMCX6    | 0.6  | down | 2.43E-05  | 2.80E-05 |
| APOBEC3G  | 0.6  | down | 2.98E-05  | 3.40E-05 |
| LPHN3     | 0.6  | down | 5.89E-05  | 6.60E-05 |
| RNF185    | 0.6  | down | 9.07E-05  | 1.00E-04 |
| RASGRP3   | 0.6  | down | 0.0002416 | 0.000259 |
| FRMD4B    | 0.6  | down | 0.0004287 | 0.000453 |
| KRTAP4-2  | 0.6  | down | 0.0004474 | 0.000472 |
| SLC4A4    | 0.59 | down | 4.00E-07  | 6.42E-07 |
| RCBTB2    | 0.59 | down | 1.80E-06  | 2.48E-06 |
| ACVR1C    | 0.59 | down | 5.30E-06  | 6.67E-06 |
| CD163L1   | 0.59 | down | 9.80E-06  | 1.19E-05 |

|           |      |      |           |          |
|-----------|------|------|-----------|----------|
| C15orf51  | 0.59 | down | 1.59E-05  | 1.88E-05 |
| C15orf51  | 0.59 | down | 2.13E-05  | 2.48E-05 |
| C15orf51  | 0.59 | down | 2.13E-05  | 2.48E-05 |
| AIM2      | 0.59 | down | 2.23E-05  | 2.58E-05 |
| CRHBP     | 0.59 | down | 0.0003515 | 0.000373 |
| LOC644714 | 0.59 | down | 0.0111774 | 0.0114   |
| CTTNBP2NL | 0.58 | down | 2.00E-07  | 3.51E-07 |
| MEGF9     | 0.58 | down | 6.00E-07  | 9.21E-07 |
| C5orf36   | 0.58 | down | 1.00E-06  | 1.46E-06 |
| KRT14     | 0.58 | down | 1.50E-06  | 2.10E-06 |
| C5        | 0.58 | down | 1.70E-06  | 2.36E-06 |
| CDC25B    | 0.58 | down | 2.20E-06  | 2.98E-06 |
| ACOX2     | 0.58 | down | 2.20E-06  | 2.98E-06 |
| CTSO      | 0.58 | down | 3.90E-06  | 5.06E-06 |
| C10orf122 | 0.58 | down | 4.00E-06  | 5.17E-06 |
| ATOH8     | 0.58 | down | 4.20E-06  | 5.41E-06 |
| EPHB6     | 0.58 | down | 4.40E-06  | 5.65E-06 |
| KRTAP2-4  | 0.58 | down | 5.10E-06  | 6.44E-06 |
| KRTAP2-4  | 0.58 | down | 5.10E-06  | 6.44E-06 |
| MIR222    | 0.58 | down | 6.00E-06  | 7.51E-06 |
| LAMB3     | 0.58 | down | 6.60E-06  | 8.20E-06 |
| C15orf51  | 0.58 | down | 9.80E-06  | 1.19E-05 |
| C15orf51  | 0.58 | down | 9.80E-06  | 1.19E-05 |
| TDRD1     | 0.58 | down | 1.79E-05  | 2.10E-05 |
| SOX6      | 0.58 | down | 1.82E-05  | 2.13E-05 |
| SEMA3B    | 0.58 | down | 2.66E-05  | 3.05E-05 |
| ID4       | 0.58 | down | 3.47E-05  | 3.95E-05 |
| ZC3H12B   | 0.58 | down | 3.74E-05  | 4.25E-05 |
| BAIAP2    | 0.58 | down | 4.95E-05  | 5.58E-05 |
| G0S2      | 0.58 | down | 5.63E-05  | 6.31E-05 |
| SLC15A3   | 0.58 | down | 6.77E-05  | 7.56E-05 |
| HSPB3     | 0.58 | down | 7.36E-05  | 8.19E-05 |
| FAM82A1   | 0.58 | down | 8.42E-05  | 9.34E-05 |
| EN1       | 0.58 | down | 0.0001538 | 0.000167 |
| EVI2B     | 0.58 | down | 0.0001904 | 0.000205 |
| UBE2T     | 0.57 | down | 2.00E-07  | 3.51E-07 |
| SETDB2    | 0.57 | down | 2.00E-07  | 3.51E-07 |
| SNX9      | 0.57 | down | 2.00E-07  | 3.51E-07 |
| B2M       | 0.57 | down | 4.00E-07  | 6.42E-07 |
| HIST1H2BK | 0.57 | down | 4.00E-07  | 6.42E-07 |
| ASB6      | 0.57 | down | 4.00E-07  | 6.42E-07 |
| TMEM205   | 0.57 | down | 5.00E-07  | 7.84E-07 |
| STK3      | 0.57 | down | 5.00E-07  | 7.84E-07 |
| RAD51AP1  | 0.57 | down | 6.00E-07  | 9.21E-07 |
| FAS       | 0.57 | down | 7.00E-07  | 1.06E-06 |
| H1FO      | 0.57 | down | 7.00E-07  | 1.06E-06 |
| ADCY9     | 0.57 | down | 1.10E-06  | 1.58E-06 |
| HIST1H2BB | 0.57 | down | 1.10E-06  | 1.58E-06 |
| WIPF1     | 0.57 | down | 1.40E-06  | 1.97E-06 |
| GLRB      | 0.57 | down | 1.80E-06  | 2.48E-06 |
| PTN       | 0.57 | down | 3.00E-06  | 3.97E-06 |

|            |      |      |           |          |
|------------|------|------|-----------|----------|
| ADAMTSL4   | 0.57 | down | 3.80E-06  | 4.95E-06 |
| AFF3       | 0.57 | down | 4.30E-06  | 5.53E-06 |
| MANSC1     | 0.57 | down | 4.50E-06  | 5.77E-06 |
| PPP1R14A   | 0.57 | down | 5.50E-06  | 6.91E-06 |
| DEFB109P1B | 0.57 | down | 6.70E-06  | 8.29E-06 |
| STAT4      | 0.57 | down | 2.19E-05  | 2.54E-05 |
| RNF182     | 0.57 | down | 0.0005207 | 0.000548 |
| PLSCR4     | 0.56 | down | 1.00E-07  | 1.92E-07 |
| FAM13B     | 0.56 | down | 1.00E-07  | 1.92E-07 |
| AKAP12     | 0.56 | down | 1.00E-07  | 1.92E-07 |
| PGCP       | 0.56 | down | 1.00E-07  | 1.92E-07 |
| DDX58      | 0.56 | down | 1.00E-07  | 1.92E-07 |
| DLC1       | 0.56 | down | 2.00E-07  | 3.51E-07 |
| FOSL1      | 0.56 | down | 3.00E-07  | 5.02E-07 |
| KITLG      | 0.56 | down | 3.00E-07  | 5.02E-07 |
| GPC1       | 0.56 | down | 3.00E-07  | 5.02E-07 |
| LY6E       | 0.56 | down | 3.00E-07  | 5.02E-07 |
| TRIM25     | 0.56 | down | 4.00E-07  | 6.42E-07 |
| PLSCR1     | 0.56 | down | 4.00E-07  | 6.42E-07 |
| C10orf54   | 0.56 | down | 5.00E-07  | 7.84E-07 |
| BCL2L1     | 0.56 | down | 6.00E-07  | 9.21E-07 |
| CALB2      | 0.56 | down | 8.00E-07  | 1.19E-06 |
| RGL1       | 0.56 | down | 1.00E-06  | 1.46E-06 |
| SGSH       | 0.56 | down | 1.00E-06  | 1.46E-06 |
| FGF1       | 0.56 | down | 1.50E-06  | 2.10E-06 |
| ZFP3       | 0.56 | down | 2.30E-06  | 3.11E-06 |
| CYLD       | 0.56 | down | 2.50E-06  | 3.35E-06 |
| SCN11A     | 0.56 | down | 5.70E-06  | 7.16E-06 |
| ANO3       | 0.56 | down | 6.40E-06  | 7.98E-06 |
| HLA-J      | 0.56 | down | 6.50E-06  | 8.10E-06 |
| PTPN3      | 0.56 | down | 8.40E-06  | 1.03E-05 |
| SERPINB10  | 0.56 | down | 1.30E-05  | 1.55E-05 |
| S100A3     | 0.56 | down | 5.32E-05  | 5.98E-05 |
| CHRD1      | 0.56 | down | 8.22E-05  | 9.12E-05 |
| ANKRD20B   | 0.56 | down | 0.000156  | 0.000169 |
| PSG6       | 0.56 | down | 0.0002031 | 0.000219 |
| SLIT2      | 0.55 | down | 6.71E-12  | 2.04E-10 |
| SLC38A6    | 0.55 | down | 1.00E-07  | 1.92E-07 |
| NQO1       | 0.55 | down | 1.00E-07  | 1.92E-07 |
| GRLF1      | 0.55 | down | 1.00E-07  | 1.92E-07 |
| RARB       | 0.55 | down | 1.00E-07  | 1.92E-07 |
| FCHO2      | 0.55 | down | 1.00E-07  | 1.92E-07 |
| TMEM173    | 0.55 | down | 1.00E-07  | 1.92E-07 |
| HLA-B      | 0.55 | down | 1.00E-07  | 1.92E-07 |
| ERRFI1     | 0.55 | down | 2.00E-07  | 3.51E-07 |
| STAT2      | 0.55 | down | 2.00E-07  | 3.51E-07 |
| VAMP5      | 0.55 | down | 2.00E-07  | 3.51E-07 |
| HSD17B11   | 0.55 | down | 4.00E-07  | 6.42E-07 |
| XAF1       | 0.55 | down | 6.00E-07  | 9.21E-07 |
| FIP1L1     | 0.55 | down | 6.00E-07  | 9.21E-07 |
| HCFC2      | 0.55 | down | 1.00E-06  | 1.46E-06 |

|           |      |      |           |          |
|-----------|------|------|-----------|----------|
| SPATA18   | 0.55 | down | 1.10E-06  | 1.58E-06 |
| ARSK      | 0.55 | down | 1.10E-06  | 1.58E-06 |
| SLC47A1   | 0.55 | down | 1.30E-06  | 1.84E-06 |
| C9orf125  | 0.55 | down | 1.50E-06  | 2.10E-06 |
| ARL4D     | 0.55 | down | 1.90E-06  | 2.61E-06 |
| FAM111A   | 0.55 | down | 2.50E-06  | 3.35E-06 |
| C7orf41   | 0.55 | down | 3.30E-06  | 4.34E-06 |
| FAM49A    | 0.55 | down | 4.80E-06  | 6.11E-06 |
| RAP1GAP2  | 0.55 | down | 5.00E-06  | 6.34E-06 |
| PLAU      | 0.55 | down | 5.10E-06  | 6.44E-06 |
| PPFIBP2   | 0.55 | down | 1.36E-05  | 1.61E-05 |
| GPR77     | 0.55 | down | 1.52E-05  | 1.80E-05 |
| IRF1      | 0.55 | down | 1.61E-05  | 1.90E-05 |
| KCNN4     | 0.55 | down | 1.72E-05  | 2.02E-05 |
| IFIH1     | 0.55 | down | 1.86E-05  | 2.18E-05 |
| STYK1     | 0.55 | down | 7.02E-05  | 7.83E-05 |
| SETBP1    | 0.55 | down | 0.0001201 | 0.000132 |
| LOC644714 | 0.55 | down | 0.0002586 | 0.000277 |
| F2RL2     | 0.54 | down | 8.47E-12  | 2.05E-10 |
| RAPH1     | 0.54 | down | 2.23E-10  | 1.04E-09 |
| PRKD1     | 0.54 | down | 5.04E-10  | 1.87E-09 |
| SRGAP1    | 0.54 | down | 1.00E-07  | 1.92E-07 |
| DTNA      | 0.54 | down | 1.00E-07  | 1.92E-07 |
| NEDD9     | 0.54 | down | 1.00E-07  | 1.92E-07 |
| STOM      | 0.54 | down | 1.00E-07  | 1.92E-07 |
| CITED2    | 0.54 | down | 2.00E-07  | 3.51E-07 |
| HLA-DMA   | 0.54 | down | 2.00E-07  | 3.51E-07 |
| HLA-DMA   | 0.54 | down | 2.00E-07  | 3.51E-07 |
| RNF213    | 0.54 | down | 3.00E-07  | 5.02E-07 |
| C1orf21   | 0.54 | down | 4.00E-07  | 6.42E-07 |
| AP1S2     | 0.54 | down | 4.00E-07  | 6.42E-07 |
| HLA-DMA   | 0.54 | down | 4.00E-07  | 6.42E-07 |
| TLE1      | 0.54 | down | 4.00E-07  | 6.42E-07 |
| NMI       | 0.54 | down | 5.00E-07  | 7.84E-07 |
| PRSS12    | 0.54 | down | 5.00E-07  | 7.84E-07 |
| TMEM204   | 0.54 | down | 6.00E-07  | 9.21E-07 |
| RILPL2    | 0.54 | down | 8.00E-07  | 1.19E-06 |
| TENC1     | 0.54 | down | 1.10E-06  | 1.58E-06 |
| IKBKB     | 0.54 | down | 1.10E-06  | 1.58E-06 |
| NIPAL3    | 0.54 | down | 1.30E-06  | 1.84E-06 |
| SCML2     | 0.54 | down | 1.30E-06  | 1.84E-06 |
| PTGR1     | 0.54 | down | 1.50E-06  | 2.10E-06 |
| C8orf31   | 0.54 | down | 1.80E-06  | 2.48E-06 |
| ANK1      | 0.54 | down | 3.90E-06  | 5.06E-06 |
| NHS       | 0.54 | down | 5.80E-06  | 7.27E-06 |
| GABRA3    | 0.54 | down | 8.40E-06  | 1.03E-05 |
| RAMP1     | 0.54 | down | 9.00E-06  | 1.10E-05 |
| CPNE4     | 0.54 | down | 1.05E-05  | 1.27E-05 |
| NES       | 0.54 | down | 1.23E-05  | 1.47E-05 |
| WNT5B     | 0.54 | down | 2.02E-05  | 2.36E-05 |
| ITGA10    | 0.54 | down | 3.83E-05  | 4.35E-05 |

|           |      |      |           |          |
|-----------|------|------|-----------|----------|
| RPTN      | 0.54 | down | 0.0006807 | 0.000714 |
| PKP4      | 0.53 | down | 8.38E-10  | 2.76E-09 |
| LAMA4     | 0.53 | down | 1.55E-09  | 4.18E-09 |
| SLC16A4   | 0.53 | down | 1.00E-07  | 1.92E-07 |
| C1R       | 0.53 | down | 1.00E-07  | 1.92E-07 |
| CCPG1     | 0.53 | down | 1.00E-07  | 1.92E-07 |
| SMURF2    | 0.53 | down | 1.00E-07  | 1.92E-07 |
| MOCS2     | 0.53 | down | 1.00E-07  | 1.92E-07 |
| MOXD1     | 0.53 | down | 1.00E-07  | 1.92E-07 |
| PCDHB5    | 0.53 | down | 2.00E-07  | 3.51E-07 |
| POPDC3    | 0.53 | down | 2.00E-07  | 3.51E-07 |
| FAM38B    | 0.53 | down | 3.00E-07  | 5.02E-07 |
| SLC38A5   | 0.53 | down | 5.00E-07  | 7.84E-07 |
| PHF20     | 0.53 | down | 6.00E-07  | 9.21E-07 |
| ND2       | 0.53 | down | 9.00E-07  | 1.33E-06 |
| ARSE      | 0.53 | down | 1.00E-06  | 1.46E-06 |
| OR4F15    | 0.53 | down | 1.10E-06  | 1.58E-06 |
| FAM63A    | 0.53 | down | 7.70E-06  | 9.48E-06 |
| PDGFD     | 0.53 | down | 1.07E-05  | 1.29E-05 |
| SNAP25    | 0.53 | down | 3.65E-05  | 4.15E-05 |
| LOC441956 | 0.53 | down | 5.15E-05  | 5.79E-05 |
| IPCEF1    | 0.53 | down | 0.0001181 | 0.000129 |
| SRPX      | 0.52 | down | 1.03E-11  | 2.12E-10 |
| OR4F16    | 0.52 | down | 1.16E-11  | 2.12E-10 |
| OR4F16    | 0.52 | down | 1.16E-11  | 2.12E-10 |
| OR4F16    | 0.52 | down | 1.16E-11  | 2.12E-10 |
| GSN       | 0.52 | down | 7.51E-11  | 5.53E-10 |
| ATP8B1    | 0.52 | down | 7.60E-11  | 5.54E-10 |
| PDLIM1    | 0.52 | down | 1.85E-10  | 9.70E-10 |
| BTG1      | 0.52 | down | 2.05E-10  | 1.01E-09 |
| PTPRM     | 0.52 | down | 2.54E-10  | 1.17E-09 |
| CCL2      | 0.52 | down | 1.00E-07  | 1.92E-07 |
| AREG      | 0.52 | down | 1.00E-07  | 1.92E-07 |
| FAM3C     | 0.52 | down | 1.00E-07  | 1.92E-07 |
| FAM3C     | 0.52 | down | 1.00E-07  | 1.92E-07 |
| SYNE1     | 0.52 | down | 1.54E-07  | 1.77E-07 |
| ZNFX1     | 0.52 | down | 2.00E-07  | 3.51E-07 |
| ARHGEF9   | 0.52 | down | 2.00E-07  | 3.51E-07 |
| OLFML2B   | 0.52 | down | 3.00E-07  | 5.02E-07 |
| RDH5      | 0.52 | down | 3.00E-07  | 5.02E-07 |
| FABP3     | 0.52 | down | 4.00E-07  | 6.42E-07 |
| CDC14B    | 0.52 | down | 4.00E-07  | 6.42E-07 |
| CD9       | 0.52 | down | 6.00E-07  | 9.21E-07 |
| C9orf21   | 0.52 | down | 1.00E-06  | 1.46E-06 |
| SP110     | 0.52 | down | 1.10E-06  | 1.58E-06 |
| SCN2A     | 0.52 | down | 3.00E-06  | 3.97E-06 |
| RTKN2     | 0.52 | down | 3.30E-06  | 4.34E-06 |
| EFTUD1    | 0.52 | down | 4.10E-06  | 5.29E-06 |
| C21orf63  | 0.52 | down | 6.20E-06  | 7.76E-06 |
| PLGLB2    | 0.52 | down | 9.70E-06  | 1.18E-05 |
| PLGLB2    | 0.52 | down | 9.70E-06  | 1.18E-05 |

|           |      |      |           |          |
|-----------|------|------|-----------|----------|
| CFHR1     | 0.52 | down | 2.12E-05  | 2.47E-05 |
| EFTUD1    | 0.52 | down | 0.0001376 | 0.00015  |
| C14orf37  | 0.51 | down | 1.02E-10  | 6.88E-10 |
| SLC4A7    | 0.51 | down | 1.33E-09  | 3.78E-09 |
| RASA4     | 0.51 | down | 4.67E-09  | 9.64E-09 |
| RASA4     | 0.51 | down | 1.62E-08  | 2.54E-08 |
| ARMC4     | 0.51 | down | 1.00E-07  | 1.92E-07 |
| KCNIP3    | 0.51 | down | 1.00E-07  | 1.92E-07 |
| C5orf41   | 0.51 | down | 1.00E-07  | 1.92E-07 |
| HPS5      | 0.51 | down | 1.11E-07  | 1.32E-07 |
| TMC7      | 0.51 | down | 2.00E-07  | 3.51E-07 |
| SAMHD1    | 0.51 | down | 2.00E-07  | 3.51E-07 |
| SHROOM3   | 0.51 | down | 2.00E-07  | 3.51E-07 |
| PHYHD1    | 0.51 | down | 2.00E-07  | 3.51E-07 |
| IL1R1     | 0.51 | down | 3.00E-07  | 5.02E-07 |
| ADRB2     | 0.51 | down | 3.00E-07  | 5.02E-07 |
| IFIT5     | 0.51 | down | 4.00E-07  | 6.42E-07 |
| OR4F21    | 0.51 | down | 4.00E-07  | 6.42E-07 |
| SPATA13   | 0.51 | down | 6.00E-07  | 9.21E-07 |
| ATRNL1    | 0.51 | down | 1.10E-06  | 1.58E-06 |
| MIR221    | 0.51 | down | 1.70E-06  | 2.36E-06 |
| IFITM2    | 0.51 | down | 2.60E-06  | 3.47E-06 |
| AGTPBP1   | 0.51 | down | 3.20E-06  | 4.22E-06 |
| NHSL2     | 0.51 | down | 3.50E-06  | 4.58E-06 |
| LOC284232 | 0.51 | down | 7.20E-06  | 8.88E-06 |
| RASA4     | 0.51 | down | 8.00E-06  | 9.84E-06 |
| WDR63     | 0.51 | down | 3.67E-05  | 4.17E-05 |
| MARVELD2  | 0.51 | down | 4.07E-05  | 4.61E-05 |
| MARVELD2  | 0.51 | down | 4.07E-05  | 4.61E-05 |
| AKR1C2    | 0.51 | down | 0.0006403 | 0.000673 |
| LTBP2     | 0.5  | down | 3.35E-11  | 3.25E-10 |
| SOCS5     | 0.5  | down | 4.62E-10  | 1.77E-09 |
| ATP9A     | 0.5  | down | 6.64E-09  | 1.28E-08 |
| PEAR1     | 0.5  | down | 1.16E-08  | 1.98E-08 |
| FAM111B   | 0.5  | down | 1.00E-07  | 1.92E-07 |
| SMAGP     | 0.5  | down | 1.00E-07  | 1.92E-07 |
| MOCOS     | 0.5  | down | 1.00E-07  | 1.92E-07 |
| SLC6A6    | 0.5  | down | 1.00E-07  | 1.92E-07 |
| PLCD1     | 0.5  | down | 1.00E-07  | 1.92E-07 |
| HHIP      | 0.5  | down | 1.00E-07  | 1.92E-07 |
| CA5B      | 0.5  | down | 1.00E-07  | 1.92E-07 |
| LRRN4CL   | 0.5  | down | 2.00E-07  | 3.51E-07 |
| HIST1H2BM | 0.5  | down | 2.00E-07  | 3.51E-07 |
| AMPH      | 0.5  | down | 2.00E-07  | 3.51E-07 |
| HSPA4L    | 0.5  | down | 3.13E-07  | 3.39E-07 |
| CYP4V2    | 0.5  | down | 4.00E-07  | 6.42E-07 |
| HDAC9     | 0.5  | down | 4.00E-07  | 6.42E-07 |
| DOCK4     | 0.5  | down | 4.00E-07  | 6.42E-07 |
| RNASEK    | 0.5  | down | 5.00E-07  | 7.84E-07 |
| TFPI      | 0.5  | down | 5.00E-07  | 7.84E-07 |
| CXorf57   | 0.5  | down | 6.00E-07  | 9.21E-07 |

|           |      |      |           |          |
|-----------|------|------|-----------|----------|
| GDF5      | 0.5  | down | 8.00E-07  | 1.19E-06 |
| CD302     | 0.5  | down | 1.20E-06  | 1.71E-06 |
| LPAR6     | 0.5  | down | 3.20E-06  | 4.22E-06 |
| SORBS2    | 0.5  | down | 3.30E-06  | 4.34E-06 |
| CD4       | 0.5  | down | 6.60E-06  | 8.20E-06 |
| MMP12     | 0.5  | down | 2.19E-05  | 2.54E-05 |
| NRN1      | 0.5  | down | 4.53E-05  | 5.12E-05 |
| KRTAP4-4  | 0.5  | down | 0.0005098 | 0.000536 |
| VGLL3     | 0.49 | down | 3.50E-12  | 1.49E-10 |
| PVRL3     | 0.49 | down | 1.32E-11  | 2.22E-10 |
| NDRG1     | 0.49 | down | 1.24E-10  | 7.64E-10 |
| ADD3      | 0.49 | down | 1.74E-10  | 9.28E-10 |
| ARHGAP18  | 0.49 | down | 5.42E-10  | 1.94E-09 |
| RASAL2    | 0.49 | down | 1.22E-08  | 2.04E-08 |
| PCGF5     | 0.49 | down | 9.76E-08  | 1.18E-07 |
| SLC7A8    | 0.49 | down | 1.00E-07  | 1.92E-07 |
| CUEDC1    | 0.49 | down | 1.00E-07  | 1.92E-07 |
| CD97      | 0.49 | down | 1.00E-07  | 1.92E-07 |
| HSDL2     | 0.49 | down | 1.00E-07  | 1.92E-07 |
| SNX18     | 0.49 | down | 1.95E-07  | 2.18E-07 |
| DNM3      | 0.49 | down | 2.00E-07  | 3.51E-07 |
| MNS1      | 0.49 | down | 2.00E-07  | 3.51E-07 |
| GMFG      | 0.49 | down | 6.00E-07  | 9.21E-07 |
| TSPAN7    | 0.49 | down | 8.00E-07  | 1.19E-06 |
| C13orf15  | 0.49 | down | 2.50E-06  | 3.35E-06 |
| DMPK      | 0.49 | down | 2.50E-06  | 3.35E-06 |
| TCF19     | 0.49 | down | 2.50E-06  | 3.35E-06 |
| ZNF367    | 0.49 | down | 4.10E-06  | 5.29E-06 |
| BOC       | 0.49 | down | 9.60E-06  | 1.17E-05 |
| AJAP1     | 0.49 | down | 1.33E-05  | 1.58E-05 |
| GRIA1     | 0.49 | down | 1.82E-05  | 2.13E-05 |
| LOC400931 | 0.49 | down | 4.60E-05  | 5.20E-05 |
| COL10A1   | 0.49 | down | 0.0002525 | 0.00027  |
| NT5E      | 0.48 | down | 1.50E-12  | 1.49E-10 |
| CUBN      | 0.48 | down | 5.62E-11  | 4.47E-10 |
| CCDC92    | 0.48 | down | 1.02E-10  | 6.88E-10 |
| EMP2      | 0.48 | down | 1.17E-09  | 3.42E-09 |
| ATL3      | 0.48 | down | 1.51E-09  | 4.14E-09 |
| TSC22D1   | 0.48 | down | 1.59E-09  | 4.24E-09 |
| FAM167A   | 0.48 | down | 2.04E-09  | 5.04E-09 |
| EHBP1     | 0.48 | down | 1.00E-07  | 1.92E-07 |
| ADA       | 0.48 | down | 1.00E-07  | 1.92E-07 |
| HMOX1     | 0.48 | down | 1.00E-07  | 1.92E-07 |
| LEPREL1   | 0.48 | down | 1.00E-07  | 1.92E-07 |
| VWA5A     | 0.48 | down | 2.00E-07  | 3.51E-07 |
| ZNF559    | 0.48 | down | 2.00E-07  | 3.51E-07 |
| HIST1H2BF | 0.48 | down | 2.00E-07  | 3.51E-07 |
| TNXB      | 0.48 | down | 2.00E-07  | 3.51E-07 |
| ZNF252    | 0.48 | down | 3.00E-07  | 5.02E-07 |
| CFB       | 0.48 | down | 4.00E-07  | 6.42E-07 |
| GPX3      | 0.48 | down | 7.00E-07  | 1.06E-06 |



|          |      |      |           |          |
|----------|------|------|-----------|----------|
| RSAD2    | 0.48 | down | 8.00E-07  | 1.19E-06 |
| EPB41L3  | 0.48 | down | 9.00E-07  | 1.33E-06 |
| MSX2     | 0.48 | down | 1.00E-06  | 1.46E-06 |
| AIM1     | 0.48 | down | 1.00E-06  | 1.46E-06 |
| EPB41L4B | 0.48 | down | 1.10E-06  | 1.58E-06 |
| TCF19    | 0.48 | down | 1.70E-06  | 2.36E-06 |
| TCF19    | 0.48 | down | 1.70E-06  | 2.36E-06 |
| ANKRD5   | 0.48 | down | 3.14E-05  | 3.58E-05 |
| HLA-DPB1 | 0.48 | down | 0.0002152 | 0.000232 |
| HLA-DPB1 | 0.48 | down | 0.0002525 | 0.00027  |
| IGFBP4   | 0.47 | down | 2.03E-12  | 1.49E-10 |
| IGFBP5   | 0.47 | down | 3.38E-11  | 3.25E-10 |
| MYO1B    | 0.47 | down | 3.77E-11  | 3.39E-10 |
| ANKRD28  | 0.47 | down | 1.89E-10  | 9.83E-10 |
| SHANK2   | 0.47 | down | 3.22E-10  | 1.42E-09 |
| RNF141   | 0.47 | down | 4.51E-09  | 9.45E-09 |
| DGKI     | 0.47 | down | 4.99E-09  | 1.02E-08 |
| MMD      | 0.47 | down | 1.16E-08  | 1.98E-08 |
| KIAA0355 | 0.47 | down | 7.40E-08  | 9.20E-08 |
| GUCY1A2  | 0.47 | down | 1.00E-07  | 1.92E-07 |
| C16orf45 | 0.47 | down | 1.00E-07  | 1.92E-07 |
| PDK2     | 0.47 | down | 1.00E-07  | 1.92E-07 |
| FAM176A  | 0.47 | down | 1.00E-07  | 1.92E-07 |
| TMEM47   | 0.47 | down | 1.00E-07  | 1.92E-07 |
| DPF3     | 0.47 | down | 2.00E-07  | 3.51E-07 |
| CFB      | 0.47 | down | 2.00E-07  | 3.51E-07 |
| GMPR     | 0.47 | down | 3.00E-07  | 5.02E-07 |
| CTNND2   | 0.47 | down | 4.00E-07  | 6.42E-07 |
| ERBB4    | 0.47 | down | 8.00E-07  | 1.19E-06 |
| GPD2     | 0.47 | down | 1.10E-06  | 1.58E-06 |
| SLC16A12 | 0.47 | down | 1.20E-06  | 1.71E-06 |
| PCOLCE2  | 0.47 | down | 6.70E-06  | 8.29E-06 |
| ABLM1    | 0.47 | down | 4.70E-05  | 5.30E-05 |
| TM4SF1   | 0.46 | down | 2.58E-12  | 1.49E-10 |
| COL6A1   | 0.46 | down | 5.24E-12  | 1.86E-10 |
| APLP2    | 0.46 | down | 2.32E-11  | 2.72E-10 |
| CDH13    | 0.46 | down | 4.86E-11  | 4.05E-10 |
| SCFD2    | 0.46 | down | 3.84E-10  | 1.57E-09 |
| KRTAP2-1 | 0.46 | down | 4.61E-09  | 9.58E-09 |
| FAT4     | 0.46 | down | 6.46E-09  | 1.25E-08 |
| KRTAP2-1 | 0.46 | down | 7.21E-09  | 1.36E-08 |
| RNF213   | 0.46 | down | 1.11E-08  | 1.93E-08 |
| KLF12    | 0.46 | down | 1.00E-07  | 1.92E-07 |
| 04. Mrz  | 0.46 | down | 1.00E-07  | 1.92E-07 |
| PARP8    | 0.46 | down | 1.00E-07  | 1.92E-07 |
| LRRK2    | 0.46 | down | 2.00E-07  | 3.51E-07 |
| ID1      | 0.46 | down | 2.00E-07  | 3.51E-07 |
| FAM38B   | 0.46 | down | 3.00E-07  | 5.02E-07 |
| PTGER4   | 0.46 | down | 3.00E-07  | 5.02E-07 |
| RASA4    | 0.46 | down | 3.00E-07  | 5.02E-07 |
| BICC1    | 0.46 | down | 4.00E-07  | 6.42E-07 |

|           |      |      |           |          |
|-----------|------|------|-----------|----------|
| LY96      | 0.46 | down | 4.00E-07  | 6.42E-07 |
| ATXN7L1   | 0.46 | down | 2.00E-06  | 2.74E-06 |
| EPDR1     | 0.46 | down | 2.50E-06  | 3.35E-06 |
| SLC6A17   | 0.46 | down | 3.10E-06  | 4.10E-06 |
| RPSAP52   | 0.46 | down | 3.50E-06  | 4.58E-06 |
| MRGPRF    | 0.46 | down | 4.50E-06  | 5.77E-06 |
| C1orf183  | 0.46 | down | 6.70E-06  | 8.29E-06 |
| GPR65     | 0.46 | down | 1.08E-05  | 1.30E-05 |
| RASSF2    | 0.46 | down | 1.35E-05  | 1.60E-05 |
| GALNTL1   | 0.46 | down | 0.0001112 | 0.000122 |
| RGMB      | 0.45 | down | 1.88E-11  | 2.41E-10 |
| INADL     | 0.45 | down | 1.26E-10  | 7.72E-10 |
| FAM126A   | 0.45 | down | 1.19E-09  | 3.45E-09 |
| FOXE1     | 0.45 | down | 1.61E-09  | 4.29E-09 |
| MAP2K3    | 0.45 | down | 3.01E-08  | 4.31E-08 |
| FZD7      | 0.45 | down | 4.63E-08  | 6.10E-08 |
| RAB30     | 0.45 | down | 1.00E-07  | 1.92E-07 |
| LRRC16A   | 0.45 | down | 1.00E-07  | 1.92E-07 |
| APBB1IP   | 0.45 | down | 2.00E-07  | 3.51E-07 |
| NR1D1     | 0.45 | down | 2.00E-07  | 3.51E-07 |
| VIT       | 0.45 | down | 2.00E-07  | 3.51E-07 |
| SCML1     | 0.45 | down | 2.00E-07  | 3.51E-07 |
| C20orf103 | 0.45 | down | 4.00E-07  | 6.42E-07 |
| EVI2A     | 0.45 | down | 8.00E-07  | 1.19E-06 |
| FGL2      | 0.45 | down | 8.00E-07  | 1.19E-06 |
| FNDC1     | 0.45 | down | 9.00E-07  | 1.33E-06 |
| EXPH5     | 0.45 | down | 4.80E-06  | 6.11E-06 |
| MIR218-1  | 0.45 | down | 1.23E-05  | 1.47E-05 |
| PDGFRB    | 0.44 | down | 1.64E-11  | 2.38E-10 |
| LMO7      | 0.44 | down | 2.04E-10  | 1.01E-09 |
| SAV1      | 0.44 | down | 2.23E-10  | 1.04E-09 |
| RBM24     | 0.44 | down | 7.19E-09  | 1.36E-08 |
| LPCAT4    | 0.44 | down | 2.11E-08  | 3.16E-08 |
| C14orf49  | 0.44 | down | 3.08E-08  | 4.36E-08 |
| CPNE8     | 0.44 | down | 1.00E-07  | 1.92E-07 |
| PELI2     | 0.44 | down | 1.00E-07  | 1.92E-07 |
| CALHM2    | 0.44 | down | 1.63E-07  | 1.86E-07 |
| AFF2      | 0.44 | down | 2.00E-07  | 3.51E-07 |
| CFH       | 0.44 | down | 2.62E-07  | 2.88E-07 |
| LOC402778 | 0.44 | down | 3.00E-07  | 5.02E-07 |
| PHF11     | 0.44 | down | 3.00E-07  | 5.02E-07 |
| IRF9      | 0.44 | down | 8.33E-07  | 8.55E-07 |
| ZNF385D   | 0.44 | down | 2.00E-06  | 2.74E-06 |
| ASB5      | 0.44 | down | 2.20E-06  | 2.98E-06 |
| LOC729420 | 0.44 | down | 0.0001104 | 0.000121 |
| AHR       | 0.43 | down | 1.82E-11  | 2.38E-10 |
| ETHE1     | 0.43 | down | 8.20E-11  | 5.85E-10 |
| UGCG      | 0.43 | down | 1.95E-10  | 9.92E-10 |
| IRS1      | 0.43 | down | 1.30E-08  | 2.14E-08 |
| MAMLD1    | 0.43 | down | 1.73E-08  | 2.70E-08 |
| GRAMD3    | 0.43 | down | 3.41E-08  | 4.76E-08 |

|            |      |      |           |          |
|------------|------|------|-----------|----------|
| PARP14     | 0.43 | down | 7.31E-08  | 9.10E-08 |
| KCTD12     | 0.43 | down | 1.00E-07  | 1.92E-07 |
| LOC400590  | 0.43 | down | 1.00E-07  | 1.92E-07 |
| DOK1       | 0.43 | down | 1.57E-07  | 1.81E-07 |
| RARG       | 0.43 | down | 1.60E-07  | 1.84E-07 |
| SYCP2      | 0.43 | down | 2.00E-07  | 3.51E-07 |
| ALS2CR11   | 0.43 | down | 4.00E-07  | 6.42E-07 |
| SMAD6      | 0.43 | down | 5.00E-07  | 7.84E-07 |
| FNDC4      | 0.43 | down | 5.73E-07  | 5.94E-07 |
| KIRREL3    | 0.43 | down | 1.10E-06  | 1.58E-06 |
| C6orf155   | 0.43 | down | 2.70E-06  | 3.60E-06 |
| NCALD      | 0.43 | down | 4.10E-06  | 5.29E-06 |
| DOCK10     | 0.42 | down | 8.89E-12  | 2.05E-10 |
| SH3BP4     | 0.42 | down | 1.54E-09  | 4.17E-09 |
| KRTAP1-3   | 0.42 | down | 3.59E-08  | 4.93E-08 |
| KRTAP1-3   | 0.42 | down | 3.59E-08  | 4.93E-08 |
| MTSS1L     | 0.42 | down | 7.27E-08  | 9.06E-08 |
| ZFP36      | 0.42 | down | 1.00E-07  | 1.92E-07 |
| CDYL2      | 0.42 | down | 1.60E-07  | 1.84E-07 |
| SNORD114-6 | 0.42 | down | 2.00E-07  | 3.51E-07 |
| OPCML      | 0.42 | down | 6.00E-07  | 9.21E-07 |
| GPX7       | 0.42 | down | 1.00E-06  | 1.46E-06 |
| ATP10A     | 0.42 | down | 2.10E-06  | 2.86E-06 |
| CNTNAP2    | 0.42 | down | 2.32E-05  | 2.68E-05 |
| LEPR       | 0.42 | down | 4.80E-05  | 5.41E-05 |
| MT1M       | 0.42 | down | 0.0001243 | 0.000136 |
| FBLN5      | 0.41 | down | 7.01E-12  | 2.04E-10 |
| DSEL       | 0.41 | down | 3.18E-11  | 3.25E-10 |
| LHFP       | 0.41 | down | 6.11E-11  | 4.75E-10 |
| LIN7A      | 0.41 | down | 6.73E-10  | 2.35E-09 |
| CDO1       | 0.41 | down | 1.19E-09  | 3.45E-09 |
| ZEB2       | 0.41 | down | 1.35E-09  | 3.81E-09 |
| ITGB8      | 0.41 | down | 3.88E-09  | 8.32E-09 |
| RORA       | 0.41 | down | 5.01E-09  | 1.02E-08 |
| SH2D4A     | 0.41 | down | 8.98E-09  | 1.63E-08 |
| MBOAT1     | 0.41 | down | 1.00E-07  | 1.92E-07 |
| CADPS2     | 0.41 | down | 1.00E-07  | 1.92E-07 |
| CNIH3      | 0.41 | down | 2.00E-07  | 3.51E-07 |
| PCDHB2     | 0.41 | down | 2.00E-07  | 3.51E-07 |
| CRABP2     | 0.41 | down | 2.89E-07  | 3.14E-07 |
| DAAM2      | 0.41 | down | 4.00E-07  | 6.42E-07 |
| SEPP1      | 0.41 | down | 6.00E-07  | 9.21E-07 |
| CCNE2      | 0.41 | down | 7.00E-07  | 1.06E-06 |
| GHR        | 0.41 | down | 1.10E-06  | 1.58E-06 |
| RUNX3      | 0.41 | down | 1.30E-06  | 1.84E-06 |
| PABPC5     | 0.41 | down | 2.20E-06  | 2.98E-06 |
| SHOX2      | 0.41 | down | 2.60E-06  | 3.47E-06 |
| EPSTI1     | 0.41 | down | 2.70E-06  | 3.60E-06 |
| IRF6       | 0.41 | down | 3.90E-06  | 5.06E-06 |
| UPK1B      | 0.41 | down | 8.90E-06  | 1.09E-05 |
| ANKRD30B   | 0.41 | down | 0.0001037 | 0.000114 |

|           |      |      |           |          |
|-----------|------|------|-----------|----------|
| PRRX1     | 0.4  | down | 2.53E-12  | 1.49E-10 |
| RAB3B     | 0.4  | down | 1.63E-11  | 2.38E-10 |
| CD109     | 0.4  | down | 2.58E-09  | 6.06E-09 |
| LGALS3    | 0.4  | down | 1.44E-08  | 2.30E-08 |
| FMOD      | 0.4  | down | 7.00E-08  | 8.76E-08 |
| LOC84856  | 0.4  | down | 1.00E-07  | 1.92E-07 |
| IGFBP6    | 0.4  | down | 1.00E-07  | 1.92E-07 |
| GALNT3    | 0.4  | down | 1.00E-07  | 1.92E-07 |
| DDX60     | 0.4  | down | 1.00E-07  | 1.92E-07 |
| TMEM140   | 0.4  | down | 1.00E-07  | 1.92E-07 |
| WWC1      | 0.4  | down | 1.03E-07  | 1.24E-07 |
| PSG2      | 0.4  | down | 7.00E-07  | 1.06E-06 |
| MOSC2     | 0.4  | down | 2.10E-06  | 2.86E-06 |
| TBC1D2    | 0.39 | down | 9.49E-11  | 6.57E-10 |
| APOBEC3B  | 0.39 | down | 2.14E-10  | 1.03E-09 |
| HLA-DPA1  | 0.39 | down | 7.59E-10  | 2.55E-09 |
| HLA-DPA1  | 0.39 | down | 7.59E-10  | 2.55E-09 |
| NEFM      | 0.39 | down | 3.12E-09  | 7.03E-09 |
| SECTM1    | 0.39 | down | 1.00E-07  | 1.92E-07 |
| MSX1      | 0.39 | down | 1.00E-07  | 1.92E-07 |
| SGK3      | 0.39 | down | 1.00E-07  | 1.92E-07 |
| HLA-DPA1  | 0.39 | down | 1.00E-07  | 1.92E-07 |
| OMD       | 0.39 | down | 4.00E-07  | 6.42E-07 |
| ETV1      | 0.39 | down | 5.58E-07  | 5.80E-07 |
| RARRES3   | 0.39 | down | 6.00E-07  | 9.21E-07 |
| HIST2H2BE | 0.39 | down | 8.30E-07  | 8.54E-07 |
| SCD5      | 0.39 | down | 1.00E-06  | 1.46E-06 |
| C17orf60  | 0.39 | down | 7.50E-06  | 9.24E-06 |
| CACNA2D1  | 0.38 | down | 1.21E-11  | 2.15E-10 |
| RND3      | 0.38 | down | 2.17E-11  | 2.63E-10 |
| APPL2     | 0.38 | down | 1.36E-10  | 8.13E-10 |
| MALL      | 0.38 | down | 1.71E-09  | 4.38E-09 |
| JAG1      | 0.38 | down | 3.75E-08  | 5.09E-08 |
| BAALC     | 0.38 | down | 2.00E-07  | 3.51E-07 |
| SIX2      | 0.38 | down | 3.43E-07  | 3.70E-07 |
| RORB      | 0.38 | down | 1.30E-06  | 1.84E-06 |
| DOK5      | 0.38 | down | 2.10E-06  | 2.86E-06 |
| TXNIP     | 0.37 | down | 7.70E-11  | 5.55E-10 |
| ADM       | 0.37 | down | 3.55E-10  | 1.52E-09 |
| KRTAP2-4  | 0.37 | down | 3.69E-10  | 1.54E-09 |
| KRTAP2-4  | 0.37 | down | 3.69E-10  | 1.54E-09 |
| TCEA3     | 0.37 | down | 5.89E-09  | 1.15E-08 |
| CMKLR1    | 0.37 | down | 1.00E-07  | 1.92E-07 |
| EDA2R     | 0.37 | down | 1.00E-07  | 1.92E-07 |
| GRAMD1B   | 0.37 | down | 1.72E-07  | 1.95E-07 |
| DUSP5     | 0.37 | down | 2.87E-07  | 3.12E-07 |
| HOMER2    | 0.37 | down | 3.00E-07  | 5.02E-07 |
| C10orf116 | 0.37 | down | 1.20E-06  | 1.71E-06 |
| NGF       | 0.37 | down | 2.50E-06  | 3.35E-06 |
| PSG1      | 0.37 | down | 0.0002308 | 0.000248 |
| PSG3      | 0.37 | down | 0.0003691 | 0.000392 |

|          |      |      |          |          |
|----------|------|------|----------|----------|
| PDGFRA   | 0.36 | down | 1.11E-11 | 2.12E-10 |
| PROS1    | 0.36 | down | 1.54E-11 | 2.38E-10 |
| COL14A1  | 0.36 | down | 1.09E-09 | 3.31E-09 |
| TEC      | 0.36 | down | 2.56E-09 | 6.06E-09 |
| MGLL     | 0.36 | down | 5.30E-09 | 1.06E-08 |
| HPCAL1   | 0.36 | down | 7.84E-08 | 9.69E-08 |
| SYTL2    | 0.36 | down | 1.00E-07 | 1.92E-07 |
| TTC39C   | 0.36 | down | 1.00E-07 | 1.92E-07 |
| TBC1D8   | 0.36 | down | 2.00E-07 | 3.51E-07 |
| DCLK1    | 0.36 | down | 4.00E-07 | 6.42E-07 |
| STK32B   | 0.36 | down | 1.10E-06 | 1.58E-06 |
| HLA-DPB1 | 0.36 | down | 2.48E-05 | 2.85E-05 |
| PLAT     | 0.35 | down | 5.59E-12 | 1.86E-10 |
| CCRL1    | 0.35 | down | 1.10E-10 | 7.20E-10 |
| SERPING1 | 0.35 | down | 8.00E-10 | 2.66E-09 |
| SERPINF1 | 0.35 | down | 9.05E-10 | 2.91E-09 |
| ADAMTS2  | 0.35 | down | 1.67E-09 | 4.34E-09 |
| CDH6     | 0.35 | down | 2.87E-09 | 6.58E-09 |
| PTPRG    | 0.35 | down | 5.52E-09 | 1.09E-08 |
| SPRY2    | 0.35 | down | 7.43E-09 | 1.39E-08 |
| PORCN    | 0.35 | down | 1.97E-08 | 2.98E-08 |
| ACSS3    | 0.35 | down | 3.02E-08 | 4.31E-08 |
| APOL6    | 0.35 | down | 4.29E-08 | 5.70E-08 |
| NAP1L3   | 0.35 | down | 8.22E-08 | 1.01E-07 |
| MX2      | 0.35 | down | 1.00E-07 | 1.92E-07 |
| NR4A3    | 0.35 | down | 1.00E-07 | 1.92E-07 |
| CNKSR3   | 0.35 | down | 2.33E-07 | 2.59E-07 |
| ZMAT1    | 0.35 | down | 4.00E-07 | 6.42E-07 |
| DTX3L    | 0.35 | down | 4.48E-07 | 4.72E-07 |
| CXCL16   | 0.35 | down | 1.10E-06 | 1.58E-06 |
| TGFBR3   | 0.35 | down | 2.05E-06 | 2.05E-06 |
| ZDHHC15  | 0.35 | down | 2.80E-06 | 3.72E-06 |
| SNED1    | 0.35 | down | 3.70E-06 | 4.83E-06 |
| STAC     | 0.35 | down | 4.20E-06 | 5.41E-06 |
| SNORA20  | 0.35 | down | 6.60E-06 | 8.20E-06 |
| MARK1    | 0.35 | down | 1.17E-05 | 1.40E-05 |
| FBN2     | 0.34 | down | 3.29E-12 | 1.49E-10 |
| MYCT1    | 0.34 | down | 1.12E-11 | 2.12E-10 |
| RGS7     | 0.34 | down | 2.89E-10 | 1.30E-09 |
| PALMD    | 0.34 | down | 6.99E-10 | 2.42E-09 |
| ZNF415   | 0.34 | down | 6.03E-09 | 1.17E-08 |
| EFNA5    | 0.34 | down | 2.35E-08 | 3.46E-08 |
| LAMA2    | 0.34 | down | 2.92E-08 | 4.21E-08 |
| SVIL     | 0.34 | down | 2.80E-07 | 3.06E-07 |
| GFRA2    | 0.34 | down | 6.46E-05 | 7.23E-05 |
| PCDH18   | 0.33 | down | 3.98E-11 | 3.53E-10 |
| ITPR3    | 0.33 | down | 2.50E-09 | 5.97E-09 |
| DENND3   | 0.33 | down | 6.89E-09 | 1.31E-08 |
| MAFIP    | 0.33 | down | 7.84E-09 | 1.45E-08 |
| NR4A2    | 0.33 | down | 1.14E-08 | 1.96E-08 |
| CPS1     | 0.33 | down | 1.59E-08 | 2.50E-08 |

|          |      |      |          |          |
|----------|------|------|----------|----------|
| TIAM2    | 0.33 | down | 1.65E-08 | 2.58E-08 |
| PRKAA2   | 0.33 | down | 2.26E-08 | 3.34E-08 |
| NAALADL2 | 0.33 | down | 4.54E-08 | 5.99E-08 |
| PROS1    | 0.33 | down | 1.00E-07 | 1.92E-07 |
| ANKFN1   | 0.33 | down | 2.00E-07 | 3.51E-07 |
| RCAN2    | 0.33 | down | 3.80E-06 | 4.95E-06 |
| LPAR1    | 0.32 | down | 5.63E-12 | 1.86E-10 |
| PPP4R4   | 0.32 | down | 7.41E-10 | 2.55E-09 |
| NRG1     | 0.32 | down | 1.14E-09 | 3.42E-09 |
| MYO1D    | 0.32 | down | 4.23E-09 | 8.95E-09 |
| AMOT     | 0.32 | down | 1.30E-08 | 2.14E-08 |
| EML1     | 0.32 | down | 3.65E-08 | 5.00E-08 |
| DSP      | 0.32 | down | 3.67E-08 | 5.00E-08 |
| PPARG    | 0.32 | down | 1.00E-07 | 1.92E-07 |
| PSMB9    | 0.32 | down | 1.00E-07 | 1.92E-07 |
| EYA1     | 0.32 | down | 1.00E-07 | 1.92E-07 |
| PSMB9    | 0.32 | down | 1.00E-07 | 1.92E-07 |
| PSMB9    | 0.32 | down | 1.00E-07 | 1.92E-07 |
| CPE      | 0.32 | down | 1.17E-07 | 1.38E-07 |
| LARGE    | 0.32 | down | 1.33E-07 | 1.55E-07 |
| STAMBPL1 | 0.32 | down | 1.54E-07 | 1.78E-07 |
| TNXA     | 0.32 | down | 3.00E-07 | 5.02E-07 |
| TNXB     | 0.32 | down | 7.00E-07 | 1.06E-06 |
| TNXB     | 0.32 | down | 7.00E-07 | 1.06E-06 |
| SLC12A6  | 0.32 | down | 9.30E-07 | 9.51E-07 |
| NOTCH3   | 0.32 | down | 1.95E-06 | 1.96E-06 |
| OSR2     | 0.32 | down | 2.60E-06 | 3.47E-06 |
| CAMK2D   | 0.31 | down | 3.71E-10 | 1.54E-09 |
| TRIB2    | 0.31 | down | 2.21E-09 | 5.39E-09 |
| ANK3     | 0.31 | down | 2.72E-09 | 6.29E-09 |
| LOXL3    | 0.31 | down | 1.43E-08 | 2.28E-08 |
| ECM1     | 0.31 | down | 3.87E-08 | 5.23E-08 |
| PTGIS    | 0.31 | down | 3.92E-08 | 5.28E-08 |
| USP18    | 0.31 | down | 5.36E-08 | 6.90E-08 |
| CCDC23   | 0.31 | down | 2.00E-07 | 3.51E-07 |
| PRSS23   | 0.31 | down | 2.00E-07 | 3.51E-07 |
| CPT1A    | 0.31 | down | 7.41E-07 | 7.65E-07 |
| IGFBP2   | 0.31 | down | 7.58E-07 | 7.82E-07 |
| PRRX2    | 0.31 | down | 1.41E-06 | 1.43E-06 |
| CXCL10   | 0.3  | down | 1.93E-10 | 9.91E-10 |
| SEMA3A   | 0.3  | down | 2.15E-10 | 1.03E-09 |
| HTRA1    | 0.3  | down | 3.48E-10 | 1.51E-09 |
| TMEM171  | 0.3  | down | 3.72E-09 | 8.05E-09 |
| SYT14    | 0.3  | down | 5.11E-09 | 1.03E-08 |
| JAM2     | 0.3  | down | 1.15E-08 | 1.96E-08 |
| FBLN1    | 0.3  | down | 1.79E-08 | 2.75E-08 |
| EPHB1    | 0.3  | down | 3.17E-08 | 4.48E-08 |
| FAM107B  | 0.3  | down | 4.68E-08 | 6.14E-08 |
| EYA2     | 0.3  | down | 2.00E-07 | 3.51E-07 |
| S100A4   | 0.3  | down | 3.00E-07 | 5.02E-07 |
| OAS1     | 0.3  | down | 4.00E-07 | 6.42E-07 |

|           |      |      |          |          |
|-----------|------|------|----------|----------|
| FAM162B   | 0.3  | down | 1.80E-06 | 1.82E-06 |
| PMP22     | 0.29 | down | 2.11E-11 | 2.63E-10 |
| RELN      | 0.29 | down | 9.81E-09 | 1.75E-08 |
| SLC1A1    | 0.29 | down | 1.09E-08 | 1.90E-08 |
| PNPLA3    | 0.29 | down | 1.40E-08 | 2.25E-08 |
| CAB39L    | 0.29 | down | 1.85E-08 | 2.84E-08 |
| FAM69A    | 0.29 | down | 1.00E-07 | 1.92E-07 |
| LOC389834 | 0.29 | down | 1.00E-07 | 1.92E-07 |
| GRPR      | 0.29 | down | 3.00E-07 | 5.02E-07 |
| TCF21     | 0.29 | down | 4.88E-07 | 5.13E-07 |
| WISP1     | 0.29 | down | 1.60E-06 | 2.23E-06 |
| CYTH3     | 0.28 | down | 3.64E-10 | 1.54E-09 |
| SLITRK1   | 0.28 | down | 2.44E-09 | 5.84E-09 |
| CPEB2     | 0.28 | down | 1.00E-08 | 1.78E-08 |
| FLG       | 0.28 | down | 1.26E-08 | 2.08E-08 |
| KIAA1644  | 0.28 | down | 1.00E-07 | 1.92E-07 |
| CHST15    | 0.28 | down | 1.30E-06 | 1.84E-06 |
| DCN       | 0.27 | down | 8.35E-12 | 2.05E-10 |
| GPNMB     | 0.27 | down | 1.14E-10 | 7.39E-10 |
| SERPINI1  | 0.27 | down | 2.18E-10 | 1.04E-09 |
| SVEP1     | 0.27 | down | 9.53E-10 | 3.03E-09 |
| NRG1      | 0.27 | down | 1.42E-09 | 3.92E-09 |
| ZFP36L2   | 0.27 | down | 1.53E-09 | 4.17E-09 |
| GSTM5     | 0.27 | down | 7.23E-09 | 1.36E-08 |
| PARP9     | 0.27 | down | 8.96E-09 | 1.63E-08 |
| CLSTN2    | 0.27 | down | 3.03E-08 | 4.31E-08 |
| PRR16     | 0.27 | down | 8.60E-08 | 1.05E-07 |
| ABCC9     | 0.27 | down | 1.00E-07 | 1.92E-07 |
| SLCO3A1   | 0.27 | down | 1.38E-07 | 1.60E-07 |
| INA       | 0.27 | down | 2.21E-07 | 2.46E-07 |
| FOXF2     | 0.27 | down | 5.00E-07 | 7.84E-07 |
| PAMR1     | 0.26 | down | 3.49E-10 | 1.51E-09 |
| LGR5      | 0.26 | down | 1.15E-09 | 3.42E-09 |
| SERPINA9  | 0.26 | down | 1.31E-08 | 2.14E-08 |
| PRELP     | 0.26 | down | 1.78E-08 | 2.75E-08 |
| GALNT14   | 0.26 | down | 4.68E-08 | 6.14E-08 |
| PLA2G4A   | 0.26 | down | 1.09E-07 | 1.30E-07 |
| WNT2B     | 0.26 | down | 1.47E-07 | 1.71E-07 |
| ALX1      | 0.26 | down | 2.00E-07 | 3.51E-07 |
| C8orf79   | 0.26 | down | 2.72E-07 | 2.98E-07 |
| C10orf72  | 0.26 | down | 9.00E-07 | 1.33E-06 |
| MAMDC2    | 0.26 | down | 1.00E-06 | 1.46E-06 |
| NMT2      | 0.25 | down | 5.38E-10 | 1.94E-09 |
| RNF150    | 0.25 | down | 1.58E-09 | 4.24E-09 |
| C4orf22   | 0.25 | down | 1.67E-09 | 4.34E-09 |
| TMEM132B  | 0.25 | down | 1.76E-09 | 4.43E-09 |
| C14orf139 | 0.25 | down | 5.84E-09 | 1.15E-08 |
| MAFIP     | 0.25 | down | 1.78E-08 | 2.75E-08 |
| LDB2      | 0.25 | down | 2.26E-08 | 3.34E-08 |
| MAFIP     | 0.25 | down | 3.28E-08 | 4.60E-08 |
| AEBP1     | 0.25 | down | 3.91E-08 | 5.28E-08 |

|          |      |      |          |          |
|----------|------|------|----------|----------|
| STS      | 0.25 | down | 1.51E-07 | 1.75E-07 |
| CPXM2    | 0.25 | down | 2.00E-07 | 3.51E-07 |
| DLX5     | 0.25 | down | 2.00E-07 | 3.51E-07 |
| C8orf79  | 0.25 | down | 5.00E-07 | 7.84E-07 |
| BARX1    | 0.25 | down | 8.00E-07 | 1.19E-06 |
| IGFBP3   | 0.24 | down | 1.77E-11 | 2.38E-10 |
| ITGA7    | 0.24 | down | 3.09E-10 | 1.38E-09 |
| FLJ38894 | 0.24 | down | 2.61E-09 | 6.09E-09 |
| CMAH     | 0.24 | down | 4.47E-09 | 9.41E-09 |
| PITPNC1  | 0.24 | down | 1.90E-08 | 2.90E-08 |
| C7orf58  | 0.24 | down | 3.22E-08 | 4.54E-08 |
| MYPN     | 0.24 | down | 6.60E-08 | 8.35E-08 |
| STEAP2   | 0.24 | down | 6.99E-08 | 8.76E-08 |
| NPTX1    | 0.24 | down | 9.64E-08 | 1.16E-07 |
| ARL4C    | 0.24 | down | 1.71E-06 | 1.73E-06 |
| TMTC1    | 0.23 | down | 1.02E-09 | 3.18E-09 |
| SERTAD4  | 0.23 | down | 5.90E-09 | 1.15E-08 |
| HERC6    | 0.23 | down | 9.57E-09 | 1.72E-08 |
| CACNA1C  | 0.23 | down | 2.90E-08 | 4.18E-08 |
| NOV      | 0.23 | down | 4.93E-08 | 6.45E-08 |
| ESM1     | 0.23 | down | 5.61E-08 | 7.18E-08 |
| DLX1     | 0.23 | down | 7.42E-08 | 9.20E-08 |
| PDE3A    | 0.22 | down | 1.16E-09 | 3.42E-09 |
| ANGPT1   | 0.22 | down | 1.33E-08 | 2.17E-08 |
| DLX2     | 0.22 | down | 1.30E-06 | 1.84E-06 |
| STAT1    | 0.21 | down | 7.08E-12 | 2.04E-10 |
| KIAA1199 | 0.21 | down | 2.56E-09 | 6.06E-09 |
| SAMD9L   | 0.21 | down | 6.06E-09 | 1.18E-08 |
| MR1      | 0.21 | down | 1.20E-08 | 2.03E-08 |
| RNF144B  | 0.21 | down | 9.18E-08 | 1.11E-07 |
| MRAP2    | 0.21 | down | 1.00E-07 | 1.92E-07 |
| KLF4     | 0.21 | down | 2.59E-07 | 2.85E-07 |
| KCND3    | 0.21 | down | 3.00E-07 | 5.02E-07 |
| SOCS2    | 0.21 | down | 3.53E-07 | 3.78E-07 |
| C11orf87 | 0.21 | down | 6.12E-07 | 6.33E-07 |
| SLC2A12  | 0.2  | down | 3.00E-09 | 6.80E-09 |
| MX1      | 0.2  | down | 1.00E-07 | 1.92E-07 |
| KIT      | 0.2  | down | 2.00E-07 | 3.51E-07 |
| IFI30    | 0.2  | down | 9.85E-07 | 1.00E-06 |
| LPHN2    | 0.19 | down | 2.19E-10 | 1.04E-09 |
| ANKRD30B | 0.19 | down | 3.37E-09 | 7.46E-09 |
| SGCD     | 0.19 | down | 4.63E-09 | 9.59E-09 |
| SEMA6D   | 0.19 | down | 1.49E-08 | 2.37E-08 |
| TLR3     | 0.19 | down | 2.36E-07 | 2.61E-07 |
| F2R      | 0.18 | down | 1.81E-11 | 2.38E-10 |
| GRIA3    | 0.18 | down | 1.21E-09 | 3.47E-09 |
| AOX1     | 0.18 | down | 1.13E-08 | 1.95E-08 |
| PLCE1    | 0.18 | down | 1.17E-08 | 1.98E-08 |
| WNT16    | 0.18 | down | 1.46E-08 | 2.33E-08 |
| IFIT3    | 0.18 | down | 2.65E-08 | 3.85E-08 |
| NFASC    | 0.18 | down | 6.93E-08 | 8.70E-08 |



|           |      |      |          |          |
|-----------|------|------|----------|----------|
| OAS3      | 0.18 | down | 1.00E-07 | 1.92E-07 |
| CPM       | 0.18 | down | 1.76E-07 | 1.99E-07 |
| CST2      | 0.18 | down | 3.00E-07 | 5.02E-07 |
| EBF1      | 0.18 | down | 3.61E-07 | 3.86E-07 |
| IGF2      | 0.18 | down | 9.79E-07 | 9.99E-07 |
| KLHL13    | 0.17 | down | 4.86E-09 | 9.98E-09 |
| SESN3     | 0.17 | down | 3.39E-08 | 4.74E-08 |
| HECW2     | 0.17 | down | 4.47E-08 | 5.92E-08 |
| LHX8      | 0.17 | down | 8.08E-08 | 9.93E-08 |
| IFIT2     | 0.17 | down | 1.00E-07 | 1.92E-07 |
| HEPH      | 0.17 | down | 1.00E-07 | 1.92E-07 |
| SCUBE3    | 0.17 | down | 1.50E-07 | 1.74E-07 |
| LRRC15    | 0.17 | down | 4.84E-07 | 5.09E-07 |
| MAB21L1   | 0.16 | down | 1.56E-11 | 2.38E-10 |
| FGF5      | 0.16 | down | 1.05E-09 | 3.25E-09 |
| IFI44     | 0.16 | down | 1.34E-09 | 3.78E-09 |
| IFIT1     | 0.16 | down | 3.87E-09 | 8.32E-09 |
| DNAJC6    | 0.16 | down | 5.05E-09 | 1.03E-08 |
| XG        | 0.16 | down | 8.51E-09 | 1.57E-08 |
| EBF2      | 0.16 | down | 3.73E-08 | 5.07E-08 |
| SIPA1L2   | 0.16 | down | 4.23E-08 | 5.63E-08 |
| B3GALT2   | 0.16 | down | 4.68E-08 | 6.14E-08 |
| ELN       | 0.16 | down | 5.36E-08 | 6.90E-08 |
| SATB1     | 0.16 | down | 1.77E-07 | 2.00E-07 |
| TMEM119   | 0.16 | down | 1.20E-06 | 1.71E-06 |
| AK5       | 0.15 | down | 2.78E-11 | 2.98E-10 |
| EBF3      | 0.15 | down | 9.18E-11 | 6.42E-10 |
| CCBE1     | 0.15 | down | 1.29E-09 | 3.68E-09 |
| ELFN1     | 0.15 | down | 4.47E-09 | 9.41E-09 |
| ABI3BP    | 0.14 | down | 1.09E-11 | 2.12E-10 |
| ITGBL1    | 0.14 | down | 2.25E-11 | 2.68E-10 |
| FST       | 0.14 | down | 3.69E-11 | 3.39E-10 |
| GBP3      | 0.14 | down | 3.94E-10 | 1.59E-09 |
| CRYAB     | 0.14 | down | 7.58E-10 | 2.55E-09 |
| IFI6      | 0.14 | down | 6.93E-09 | 1.32E-08 |
| IFITM1    | 0.14 | down | 8.79E-09 | 1.61E-08 |
| ACAN      | 0.14 | down | 6.55E-08 | 8.30E-08 |
| STEAP1    | 0.14 | down | 9.82E-07 | 1.00E-06 |
| ADAMTS1   | 0.13 | down | 3.96E-10 | 1.59E-09 |
| EPHA5     | 0.13 | down | 3.88E-09 | 8.32E-09 |
| USP18     | 0.13 | down | 8.54E-09 | 1.57E-08 |
| FMN2      | 0.13 | down | 1.36E-08 | 2.19E-08 |
| GABBR2    | 0.13 | down | 1.96E-08 | 2.96E-08 |
| IL7R      | 0.13 | down | 3.96E-08 | 5.32E-08 |
| OLFM2     | 0.12 | down | 1.66E-09 | 4.34E-09 |
| PSG7      | 0.12 | down | 5.49E-09 | 1.09E-08 |
| CXCL12    | 0.12 | down | 1.08E-08 | 1.89E-08 |
| C4orf31   | 0.12 | down | 1.35E-07 | 1.58E-07 |
| LOC344887 | 0.12 | down | 3.17E-07 | 3.42E-07 |
| NLRP10    | 0.11 | down | 3.86E-10 | 1.57E-09 |
| SERPINB2  | 0.11 | down | 3.98E-10 | 1.59E-09 |

|           |       |      |          |          |
|-----------|-------|------|----------|----------|
| KCNK2     | 0.11  | down | 1.36E-09 | 3.82E-09 |
| PDE5A     | 0.11  | down | 1.93E-09 | 4.85E-09 |
| NEK10     | 0.11  | down | 4.59E-09 | 9.56E-09 |
| VSNL1     | 0.11  | down | 7.26E-09 | 1.36E-08 |
| PENK      | 0.11  | down | 4.94E-07 | 5.18E-07 |
| GALNT5    | 0.1   | down | 2.07E-08 | 3.11E-08 |
| EYA4      | 0.1   | down | 7.46E-08 | 9.23E-08 |
| BEX1      | 0.097 | down | 2.65E-07 | 2.91E-07 |
| SATB2     | 0.096 | down | 6.30E-11 | 4.84E-10 |
| TNFRSF11B | 0.096 | down | 5.19E-08 | 6.74E-08 |
| EMP1      | 0.093 | down | 4.71E-10 | 1.79E-09 |
| TM4SF20   | 0.093 | down | 1.13E-08 | 1.96E-08 |
| ANKRD29   | 0.093 | down | 1.83E-07 | 2.06E-07 |
| APCDD1    | 0.093 | down | 2.65E-07 | 2.91E-07 |
| SAMD9     | 0.09  | down | 2.69E-11 | 2.96E-10 |
| PDE1C     | 0.089 | down | 7.66E-09 | 1.43E-08 |
| SFRP1     | 0.089 | down | 6.73E-08 | 8.48E-08 |
| SERINC2   | 0.087 | down | 3.44E-08 | 4.79E-08 |
| KRT34     | 0.085 | down | 3.44E-09 | 7.54E-09 |
| SNTB1     | 0.084 | down | 1.04E-10 | 6.89E-10 |
| NTNG1     | 0.084 | down | 1.54E-07 | 1.77E-07 |
| COLEC12   | 0.084 | down | 1.18E-06 | 1.20E-06 |
| CTSK      | 0.081 | down | 4.46E-10 | 1.72E-09 |
| TFAP2C    | 0.078 | down | 1.49E-10 | 8.37E-10 |
| OSR1      | 0.076 | down | 4.24E-10 | 1.68E-09 |
| SLC14A1   | 0.075 | down | 5.08E-09 | 1.03E-08 |
| PSG5      | 0.075 | down | 5.24E-07 | 5.49E-07 |
| KRTAP1-1  | 0.073 | down | 1.21E-08 | 2.04E-08 |
| KRTAP1-1  | 0.073 | down | 1.21E-08 | 2.04E-08 |
| PPAP2B    | 0.07  | down | 2.14E-11 | 2.63E-10 |
| EPGN      | 0.066 | down | 5.08E-09 | 1.03E-08 |
| NLGN1     | 0.063 | down | 4.01E-09 | 8.54E-09 |
| TOX       | 0.062 | down | 8.91E-10 | 2.88E-09 |
| GCNT4     | 0.06  | down | 1.79E-08 | 2.75E-08 |
| OAS2      | 0.06  | down | 2.05E-07 | 2.30E-07 |
| IFI44L    | 0.057 | down | 1.17E-08 | 1.99E-08 |
| MKX       | 0.056 | down | 2.34E-07 | 2.59E-07 |
| CYP1B1    | 0.055 | down | 1.73E-09 | 4.40E-09 |
| NTN4      | 0.054 | down | 1.70E-09 | 4.38E-09 |
| NPR3      | 0.051 | down | 2.29E-09 | 5.56E-09 |
| GREM2     | 0.05  | down | 1.08E-09 | 3.29E-09 |
| FMN1      | 0.05  | down | 2.40E-09 | 5.78E-09 |
| MGC87042  | 0.046 | down | 1.19E-09 | 3.45E-09 |
| PTGS1     | 0.043 | down | 1.07E-09 | 3.28E-09 |
| PLCB4     | 0.041 | down | 2.70E-11 | 2.96E-10 |
| LPPR4     | 0.041 | down | 3.99E-07 | 4.26E-07 |
| ENPP2     | 0.04  | down | 1.28E-09 | 3.65E-09 |
| OLFML1    | 0.039 | down | 3.18E-09 | 7.13E-09 |
| CST1      | 0.036 | down | 5.38E-09 | 1.08E-08 |
| SIX1      | 0.033 | down | 4.27E-10 | 1.68E-09 |
| FAM180A   | 0.032 | down | 7.45E-10 | 2.55E-09 |

|          |       |      |          |          |
|----------|-------|------|----------|----------|
| C5orf23  | 0.031 | down | 6.78E-08 | 8.53E-08 |
| PAX9     | 0.031 | down | 9.35E-08 | 1.13E-07 |
| KRTAP1-1 | 0.023 | down | 2.20E-09 | 5.39E-09 |
| KRTAP1-5 | 0.019 | down | 3.73E-11 | 3.39E-10 |
| KRTAP1-5 | 0.019 | down | 3.73E-11 | 3.39E-10 |
| ITGA8    | 0.017 | down | 1.41E-10 | 8.14E-10 |

## Online Supplementary Material

Shi, Y., et al. (2012) Analysis of differentiation potentials and gene expression profiles of mesenchymal stem cells derived from periodontal ligament and Wharton's jelly of the umbilical cord. Cells Tissues Organs, DOI: 10.1159/000 343740.

Supplementary table 3. Significantly different genes between WJCMSCs and PDLSCs

| Gene Symbol | WJCMSCs_Degree | PDLSCs_Degree | K1-WJCMSCs  | K1-PDLSCs   | DiffK        | DiffK       |
|-------------|----------------|---------------|-------------|-------------|--------------|-------------|
| MAFIP       | 10             | 20            | 0.384615385 | 0.909090909 | -0.524475524 | 0.524475524 |
| CLDN1       | 4              | 11            | 0.153846154 | 0.5         | -0.346153846 | 0.346153846 |
| AKR1C1      | 3              | 10            | 0.115384615 | 0.454545455 | -0.339160839 | 0.339160839 |
| FLNB        | 2              | 9             | 0.076923077 | 0.409090909 | -0.332167832 | 0.332167832 |
| CCNE2       | 4              | 10            | 0.153846154 | 0.454545455 | -0.300699301 | 0.300699301 |
| MLLT11      | 4              | 10            | 0.153846154 | 0.454545455 | -0.300699301 | 0.300699301 |
| ZFP14       | 2              | 8             | 0.076923077 | 0.363636364 | -0.286713287 | 0.286713287 |
| KCNK2       | 7              | 12            | 0.269230769 | 0.545454545 | -0.276223776 | 0.276223776 |
| TGFB2       | 4              | 9             | 0.153846154 | 0.409090909 | -0.255244755 | 0.255244755 |
| ODZ4        | 9              | 2             | 0.346153846 | 0.090909091 | 0.255244755  | 0.255244755 |
| KCNG1       | 10             | 14            | 0.384615385 | 0.636363636 | -0.251748252 | 0.251748252 |
| DPP4        | 3              | 8             | 0.115384615 | 0.363636364 | -0.248251748 | 0.248251748 |
| PRSS35      | 3              | 8             | 0.115384615 | 0.363636364 | -0.248251748 | 0.248251748 |
| APBB2       | 1              | 6             | 0.038461538 | 0.272727273 | -0.234265734 | 0.234265734 |
| HOXC8       | 7              | 1             | 0.269230769 | 0.045454545 | 0.223776224  | 0.223776224 |
| CD9         | 6              | 10            | 0.230769231 | 0.454545455 | -0.223776224 | 0.223776224 |
| NEU1        | 12             | 15            | 0.461538462 | 0.681818182 | -0.22027972  | 0.22027972  |
| SMAD6       | 8              | 2             | 0.307692308 | 0.090909091 | 0.216783217  | 0.216783217 |
| LMO3        | 5              | 9             | 0.192307692 | 0.409090909 | -0.216783217 | 0.216783217 |
| NOX4        | 5              | 9             | 0.192307692 | 0.409090909 | -0.216783217 | 0.216783217 |
| F2RL1       | 9              | 3             | 0.346153846 | 0.136363636 | 0.20979021   | 0.20979021  |
| IL11RA      | 9              | 3             | 0.346153846 | 0.136363636 | 0.20979021   | 0.20979021  |

## Online Supplementary Material

Shi, Y., et al. (2012) Analysis of differentiation potentials and gene expression profiles of mesenchymal stem cells derived from periodontal ligament and Wharton's jelly of the umbilical cord. Cells Tissues Organs, DOI: 10.1159/000 343740.

|         |    |    |             |             |              |             |
|---------|----|----|-------------|-------------|--------------|-------------|
| FGF7    | 4  | 8  | 0.153846154 | 0.363636364 | -0.20979021  | 0.20979021  |
| FMN2    | 4  | 8  | 0.153846154 | 0.363636364 | -0.20979021  | 0.20979021  |
| SLC38A1 | 4  | 8  | 0.153846154 | 0.363636364 | -0.20979021  | 0.20979021  |
| IL7R    | 10 | 4  | 0.384615385 | 0.181818182 | 0.202797203  | 0.202797203 |
| TMEM173 | 10 | 4  | 0.384615385 | 0.181818182 | 0.202797203  | 0.202797203 |
| DSG2    | 3  | 7  | 0.115384615 | 0.318181818 | -0.202797203 | 0.202797203 |
| GFRA2   | 3  | 7  | 0.115384615 | 0.318181818 | -0.202797203 | 0.202797203 |
| GABRE   | 2  | 6  | 0.076923077 | 0.272727273 | -0.195804196 | 0.195804196 |
| ELOVL2  | 7  | 10 | 0.269230769 | 0.454545455 | -0.185314685 | 0.185314685 |
| GDF5    | 6  | 1  | 0.230769231 | 0.045454545 | 0.185314685  | 0.185314685 |
| CCND2   | 6  | 9  | 0.230769231 | 0.409090909 | -0.178321678 | 0.178321678 |
| OR51E2  | 6  | 9  | 0.230769231 | 0.409090909 | -0.178321678 | 0.178321678 |
| AEBP1   | 7  | 2  | 0.269230769 | 0.090909091 | 0.178321678  | 0.178321678 |
| HIVEP2  | 7  | 2  | 0.269230769 | 0.090909091 | 0.178321678  | 0.178321678 |
| PDK2    | 7  | 2  | 0.269230769 | 0.090909091 | 0.178321678  | 0.178321678 |
| SNCA    | 7  | 2  | 0.269230769 | 0.090909091 | 0.178321678  | 0.178321678 |
| TDRD1   | 7  | 2  | 0.269230769 | 0.090909091 | 0.178321678  | 0.178321678 |
| AVEN    | 8  | 3  | 0.307692308 | 0.136363636 | 0.171328671  | 0.171328671 |
| CDCA7L  | 8  | 3  | 0.307692308 | 0.136363636 | 0.171328671  | 0.171328671 |
| SKIL    | 8  | 3  | 0.307692308 | 0.136363636 | 0.171328671  | 0.171328671 |
| ZNF286A | 8  | 3  | 0.307692308 | 0.136363636 | 0.171328671  | 0.171328671 |
| CARD11  | 5  | 8  | 0.192307692 | 0.363636364 | -0.171328671 | 0.171328671 |
| IL1RAP  | 5  | 8  | 0.192307692 | 0.363636364 | -0.171328671 | 0.171328671 |
| PLA2G4A | 5  | 8  | 0.192307692 | 0.363636364 | -0.171328671 | 0.171328671 |

## Online Supplementary Material

Shi, Y., et al. (2012) Analysis of differentiation potentials and gene expression profiles of mesenchymal stem cells derived from periodontal ligament and Wharton's jelly of the umbilical cord. Cells Tissues Organs, DOI: 10.1159/000 343740.

|         |    |    |             |             |              |             |
|---------|----|----|-------------|-------------|--------------|-------------|
| ST8SIA4 | 5  | 8  | 0.192307692 | 0.363636364 | -0.171328671 | 0.171328671 |
| TFPI    | 5  | 8  | 0.192307692 | 0.363636364 | -0.171328671 | 0.171328671 |
| TCF19   | 15 | 9  | 0.576923077 | 0.409090909 | 0.167832168  | 0.167832168 |
| CREB5   | 9  | 4  | 0.346153846 | 0.181818182 | 0.164335664  | 0.164335664 |
| ERRFI1  | 9  | 4  | 0.346153846 | 0.181818182 | 0.164335664  | 0.164335664 |
| ITGB3   | 9  | 4  | 0.346153846 | 0.181818182 | 0.164335664  | 0.164335664 |
| LOXL3   | 9  | 4  | 0.346153846 | 0.181818182 | 0.164335664  | 0.164335664 |
| PRSS12  | 9  | 4  | 0.346153846 | 0.181818182 | 0.164335664  | 0.164335664 |
| SCG5    | 9  | 4  | 0.346153846 | 0.181818182 | 0.164335664  | 0.164335664 |
| BEX1    | 4  | 7  | 0.153846154 | 0.318181818 | -0.164335664 | 0.164335664 |
| PLCD1   | 4  | 7  | 0.153846154 | 0.318181818 | -0.164335664 | 0.164335664 |
| RHOU    | 4  | 7  | 0.153846154 | 0.318181818 | -0.164335664 | 0.164335664 |
| RBM24   | 10 | 12 | 0.384615385 | 0.545454545 | -0.160839161 | 0.160839161 |
| CLCN5   | 3  | 6  | 0.115384615 | 0.272727273 | -0.157342657 | 0.157342657 |
| HOXC5   | 3  | 6  | 0.115384615 | 0.272727273 | -0.157342657 | 0.157342657 |
| SMAD1   | 3  | 6  | 0.115384615 | 0.272727273 | -0.157342657 | 0.157342657 |
| WWC1    | 3  | 6  | 0.115384615 | 0.272727273 | -0.157342657 | 0.157342657 |
| B3GALT2 | 2  | 5  | 0.076923077 | 0.227272727 | -0.15034965  | 0.15034965  |
| IRS1    | 2  | 5  | 0.076923077 | 0.227272727 | -0.15034965  | 0.15034965  |
| WNK4    | 2  | 5  | 0.076923077 | 0.227272727 | -0.15034965  | 0.15034965  |
| FOSL1   | 8  | 10 | 0.307692308 | 0.454545455 | -0.146853147 | 0.146853147 |
| P4HA3   | 8  | 10 | 0.307692308 | 0.454545455 | -0.146853147 | 0.146853147 |
| FOXF2   | 6  | 2  | 0.230769231 | 0.090909091 | 0.13986014   | 0.13986014  |
| ATP8B1  | 7  | 3  | 0.269230769 | 0.136363636 | 0.132867133  | 0.132867133 |

## Online Supplementary Material

Shi, Y., et al. (2012) Analysis of differentiation potentials and gene expression profiles of mesenchymal stem cells derived from periodontal ligament and Wharton's jelly of the umbilical cord. Cells Tissues Organs, DOI: 10.1159/000 343740.

|          |    |    |             |             |              |             |
|----------|----|----|-------------|-------------|--------------|-------------|
| DLX1     | 7  | 3  | 0.269230769 | 0.136363636 | 0.132867133  | 0.132867133 |
| FIP1L1   | 7  | 3  | 0.269230769 | 0.136363636 | 0.132867133  | 0.132867133 |
| HTR1D    | 7  | 3  | 0.269230769 | 0.136363636 | 0.132867133  | 0.132867133 |
| ITGA2    | 7  | 3  | 0.269230769 | 0.136363636 | 0.132867133  | 0.132867133 |
| NCALD    | 7  | 3  | 0.269230769 | 0.136363636 | 0.132867133  | 0.132867133 |
| XRCC4    | 7  | 3  | 0.269230769 | 0.136363636 | 0.132867133  | 0.132867133 |
| ACOX2    | 6  | 8  | 0.230769231 | 0.363636364 | -0.132867133 | 0.132867133 |
| PTPRM    | 6  | 8  | 0.230769231 | 0.363636364 | -0.132867133 | 0.132867133 |
| RASAL2   | 6  | 8  | 0.230769231 | 0.363636364 | -0.132867133 | 0.132867133 |
| ROR2     | 6  | 8  | 0.230769231 | 0.363636364 | -0.132867133 | 0.132867133 |
| HLA-DPB1 | 12 | 13 | 0.461538462 | 0.590909091 | -0.129370629 | 0.129370629 |
| NRG1     | 14 | 9  | 0.538461538 | 0.409090909 | 0.129370629  | 0.129370629 |
| BHLHE40  | 8  | 4  | 0.307692308 | 0.181818182 | 0.125874126  | 0.125874126 |
| IER3     | 8  | 4  | 0.307692308 | 0.181818182 | 0.125874126  | 0.125874126 |
| KCNIP3   | 8  | 4  | 0.307692308 | 0.181818182 | 0.125874126  | 0.125874126 |
| PLOD2    | 8  | 4  | 0.307692308 | 0.181818182 | 0.125874126  | 0.125874126 |
| SKAP2    | 8  | 4  | 0.307692308 | 0.181818182 | 0.125874126  | 0.125874126 |
| STAC     | 8  | 4  | 0.307692308 | 0.181818182 | 0.125874126  | 0.125874126 |
| CTNND2   | 5  | 7  | 0.192307692 | 0.318181818 | -0.125874126 | 0.125874126 |
| KIR2DL3  | 5  | 7  | 0.192307692 | 0.318181818 | -0.125874126 | 0.125874126 |
| LPAR1    | 5  | 7  | 0.192307692 | 0.318181818 | -0.125874126 | 0.125874126 |
| MARK1    | 5  | 7  | 0.192307692 | 0.318181818 | -0.125874126 | 0.125874126 |
| OASL     | 5  | 7  | 0.192307692 | 0.318181818 | -0.125874126 | 0.125874126 |
| SFRP1    | 5  | 7  | 0.192307692 | 0.318181818 | -0.125874126 | 0.125874126 |

### Online Supplementary Material

Shi, Y., et al. (2012) Analysis of differentiation potentials and gene expression profiles of mesenchymal stem cells derived from periodontal ligament and Wharton's jelly of the umbilical cord. Cells Tissues Organs, DOI: 10.1159/000 343740.

|         |   |    |             |             |              |             |
|---------|---|----|-------------|-------------|--------------|-------------|
| TYRP1   | 5 | 7  | 0.192307692 | 0.318181818 | -0.125874126 | 0.125874126 |
| OSR2    | 9 | 5  | 0.346153846 | 0.227272727 | 0.118881119  | 0.118881119 |
| BMP6    | 4 | 6  | 0.153846154 | 0.272727273 | -0.118881119 | 0.118881119 |
| CAMK1D  | 4 | 6  | 0.153846154 | 0.272727273 | -0.118881119 | 0.118881119 |
| PTPRU   | 4 | 6  | 0.153846154 | 0.272727273 | -0.118881119 | 0.118881119 |
| ZFP57   | 4 | 6  | 0.153846154 | 0.272727273 | -0.118881119 | 0.118881119 |
| DCLK1   | 3 | 5  | 0.115384615 | 0.227272727 | -0.111888112 | 0.111888112 |
| MYH10   | 3 | 5  | 0.115384615 | 0.227272727 | -0.111888112 | 0.111888112 |
| PKP4    | 3 | 5  | 0.115384615 | 0.227272727 | -0.111888112 | 0.111888112 |
| VLDLR   | 3 | 5  | 0.115384615 | 0.227272727 | -0.111888112 | 0.111888112 |
| RND3    | 9 | 10 | 0.346153846 | 0.454545455 | -0.108391608 | 0.108391608 |
| GRIA1   | 2 | 4  | 0.076923077 | 0.181818182 | -0.104895105 | 0.104895105 |
| LIN7A   | 2 | 4  | 0.076923077 | 0.181818182 | -0.104895105 | 0.104895105 |
| AP1S2   | 8 | 9  | 0.307692308 | 0.409090909 | -0.101398601 | 0.101398601 |
| CADPS2  | 8 | 9  | 0.307692308 | 0.409090909 | -0.101398601 | 0.101398601 |
| MOXD1   | 5 | 2  | 0.192307692 | 0.090909091 | 0.101398601  | 0.101398601 |
| PELI1   | 5 | 2  | 0.192307692 | 0.090909091 | 0.101398601  | 0.101398601 |
| PLCE1   | 5 | 2  | 0.192307692 | 0.090909091 | 0.101398601  | 0.101398601 |
| SLC16A4 | 5 | 2  | 0.192307692 | 0.090909091 | 0.101398601  | 0.101398601 |
| ATRNL1  | 7 | 8  | 0.269230769 | 0.363636364 | -0.094405594 | 0.094405594 |
| KCNN4   | 7 | 8  | 0.269230769 | 0.363636364 | -0.094405594 | 0.094405594 |
| PTCH1   | 7 | 8  | 0.269230769 | 0.363636364 | -0.094405594 | 0.094405594 |
| RGS2    | 7 | 8  | 0.269230769 | 0.363636364 | -0.094405594 | 0.094405594 |
| SCFD2   | 7 | 8  | 0.269230769 | 0.363636364 | -0.094405594 | 0.094405594 |



### Online Supplementary Material

Shi, Y., et al. (2012) Analysis of differentiation potentials and gene expression profiles of mesenchymal stem cells derived from periodontal ligament and Wharton's jelly of the umbilical cord. Cells Tissues Organs, DOI: 10.1159/000 343740.

|          |   |   |             |             |              |             |
|----------|---|---|-------------|-------------|--------------|-------------|
| SLC4A7   | 7 | 8 | 0.269230769 | 0.363636364 | -0.094405594 | 0.094405594 |
| ATP2B1   | 6 | 3 | 0.230769231 | 0.136363636 | 0.094405594  | 0.094405594 |
| CXCL6    | 6 | 3 | 0.230769231 | 0.136363636 | 0.094405594  | 0.094405594 |
| DUSP5    | 6 | 3 | 0.230769231 | 0.136363636 | 0.094405594  | 0.094405594 |
| SLCO3A1  | 6 | 3 | 0.230769231 | 0.136363636 | 0.094405594  | 0.094405594 |
| ADA      | 7 | 4 | 0.269230769 | 0.181818182 | 0.087412587  | 0.087412587 |
| DHCR7    | 7 | 4 | 0.269230769 | 0.181818182 | 0.087412587  | 0.087412587 |
| GPR126   | 7 | 4 | 0.269230769 | 0.181818182 | 0.087412587  | 0.087412587 |
| ITGA4    | 7 | 4 | 0.269230769 | 0.181818182 | 0.087412587  | 0.087412587 |
| NLGN1    | 7 | 4 | 0.269230769 | 0.181818182 | 0.087412587  | 0.087412587 |
| OLR1     | 7 | 4 | 0.269230769 | 0.181818182 | 0.087412587  | 0.087412587 |
| PPARG    | 7 | 4 | 0.269230769 | 0.181818182 | 0.087412587  | 0.087412587 |
| PRKAA2   | 7 | 4 | 0.269230769 | 0.181818182 | 0.087412587  | 0.087412587 |
| RHOF     | 7 | 4 | 0.269230769 | 0.181818182 | 0.087412587  | 0.087412587 |
| AMOT     | 6 | 7 | 0.230769231 | 0.318181818 | -0.087412587 | 0.087412587 |
| GATA6    | 6 | 7 | 0.230769231 | 0.318181818 | -0.087412587 | 0.087412587 |
| IL32     | 6 | 7 | 0.230769231 | 0.318181818 | -0.087412587 | 0.087412587 |
| IRF1     | 6 | 7 | 0.230769231 | 0.318181818 | -0.087412587 | 0.087412587 |
| OR10P1   | 6 | 7 | 0.230769231 | 0.318181818 | -0.087412587 | 0.087412587 |
| SLC16A12 | 6 | 7 | 0.230769231 | 0.318181818 | -0.087412587 | 0.087412587 |
| ID1      | 8 | 5 | 0.307692308 | 0.227272727 | 0.08041958   | 0.08041958  |
| SLC7A2   | 8 | 5 | 0.307692308 | 0.227272727 | 0.08041958   | 0.08041958  |
| STAT5B   | 8 | 5 | 0.307692308 | 0.227272727 | 0.08041958   | 0.08041958  |
| CYP4V2   | 5 | 6 | 0.192307692 | 0.272727273 | -0.08041958  | 0.08041958  |

## Online Supplementary Material

Shi, Y., et al. (2012) Analysis of differentiation potentials and gene expression profiles of mesenchymal stem cells derived from periodontal ligament and Wharton's jelly of the umbilical cord. Cells Tissues Organs, DOI: 10.1159/000 343740.

|          |    |   |             |             |              |             |
|----------|----|---|-------------|-------------|--------------|-------------|
| DUSP4    | 5  | 6 | 0.192307692 | 0.272727273 | -0.08041958  | 0.08041958  |
| KIAA1598 | 5  | 6 | 0.192307692 | 0.272727273 | -0.08041958  | 0.08041958  |
| MAMLD1   | 5  | 6 | 0.192307692 | 0.272727273 | -0.08041958  | 0.08041958  |
| STAT1    | 5  | 6 | 0.192307692 | 0.272727273 | -0.08041958  | 0.08041958  |
| USP9Y    | 5  | 6 | 0.192307692 | 0.272727273 | -0.08041958  | 0.08041958  |
| KIR3DL1  | 4  | 5 | 0.153846154 | 0.227272727 | -0.073426573 | 0.073426573 |
| SEMA3A   | 4  | 5 | 0.153846154 | 0.227272727 | -0.073426573 | 0.073426573 |
| CITED2   | 10 | 7 | 0.384615385 | 0.318181818 | 0.066433566  | 0.066433566 |
| GABBR2   | 10 | 7 | 0.384615385 | 0.318181818 | 0.066433566  | 0.066433566 |
| WNT16    | 10 | 7 | 0.384615385 | 0.318181818 | 0.066433566  | 0.066433566 |
| C3       | 3  | 4 | 0.115384615 | 0.181818182 | -0.066433566 | 0.066433566 |
| ERN1     | 3  | 4 | 0.115384615 | 0.181818182 | -0.066433566 | 0.066433566 |
| GABRA3   | 3  | 4 | 0.115384615 | 0.181818182 | -0.066433566 | 0.066433566 |
| HSPA4L   | 3  | 4 | 0.115384615 | 0.181818182 | -0.066433566 | 0.066433566 |
| PECR     | 3  | 4 | 0.115384615 | 0.181818182 | -0.066433566 | 0.066433566 |
| PPP1R13B | 3  | 4 | 0.115384615 | 0.181818182 | -0.066433566 | 0.066433566 |
| SERPING1 | 3  | 4 | 0.115384615 | 0.181818182 | -0.066433566 | 0.066433566 |
| UCHL1    | 3  | 4 | 0.115384615 | 0.181818182 | -0.066433566 | 0.066433566 |
| LARGE    | 9  | 9 | 0.346153846 | 0.409090909 | -0.062937063 | 0.062937063 |
| KITLG    | 2  | 3 | 0.076923077 | 0.136363636 | -0.059440559 | 0.059440559 |
| GRIA3    | 5  | 3 | 0.192307692 | 0.136363636 | 0.055944056  | 0.055944056 |
| LPHN2    | 5  | 3 | 0.192307692 | 0.136363636 | 0.055944056  | 0.055944056 |
| TGFBI    | 5  | 3 | 0.192307692 | 0.136363636 | 0.055944056  | 0.055944056 |
| INHBA    | 8  | 8 | 0.307692308 | 0.363636364 | -0.055944056 | 0.055944056 |

## Online Supplementary Material

Shi, Y., et al. (2012) Analysis of differentiation potentials and gene expression profiles of mesenchymal stem cells derived from periodontal ligament and Wharton's jelly of the umbilical cord. Cells Tissues Organs, DOI: 10.1159/000 343740.

|          |   |   |             |             |              |             |
|----------|---|---|-------------|-------------|--------------|-------------|
| LY96     | 8 | 8 | 0.307692308 | 0.363636364 | -0.055944056 | 0.055944056 |
| PAQR5    | 8 | 8 | 0.307692308 | 0.363636364 | -0.055944056 | 0.055944056 |
| PRKD1    | 8 | 8 | 0.307692308 | 0.363636364 | -0.055944056 | 0.055944056 |
| CPE      | 7 | 7 | 0.269230769 | 0.318181818 | -0.048951049 | 0.048951049 |
| TLE1     | 7 | 7 | 0.269230769 | 0.318181818 | -0.048951049 | 0.048951049 |
| GCNT4    | 6 | 4 | 0.230769231 | 0.181818182 | 0.048951049  | 0.048951049 |
| SLC12A7  | 6 | 4 | 0.230769231 | 0.181818182 | 0.048951049  | 0.048951049 |
| TNFRSF9  | 6 | 4 | 0.230769231 | 0.181818182 | 0.048951049  | 0.048951049 |
| EMP2     | 7 | 5 | 0.269230769 | 0.227272727 | 0.041958042  | 0.041958042 |
| OR4F21   | 7 | 5 | 0.269230769 | 0.227272727 | 0.041958042  | 0.041958042 |
| SOX6     | 7 | 5 | 0.269230769 | 0.227272727 | 0.041958042  | 0.041958042 |
| CDC14B   | 6 | 6 | 0.230769231 | 0.272727273 | -0.041958042 | 0.041958042 |
| HMCN1    | 6 | 6 | 0.230769231 | 0.272727273 | -0.041958042 | 0.041958042 |
| HYOU1    | 6 | 6 | 0.230769231 | 0.272727273 | -0.041958042 | 0.041958042 |
| KIT      | 6 | 6 | 0.230769231 | 0.272727273 | -0.041958042 | 0.041958042 |
| NQO1     | 6 | 6 | 0.230769231 | 0.272727273 | -0.041958042 | 0.041958042 |
| PRKG2    | 6 | 6 | 0.230769231 | 0.272727273 | -0.041958042 | 0.041958042 |
| PRKY     | 6 | 6 | 0.230769231 | 0.272727273 | -0.041958042 | 0.041958042 |
| RAB3B    | 6 | 6 | 0.230769231 | 0.272727273 | -0.041958042 | 0.041958042 |
| SLC2A12  | 6 | 6 | 0.230769231 | 0.272727273 | -0.041958042 | 0.041958042 |
| ZNF367   | 6 | 6 | 0.230769231 | 0.272727273 | -0.041958042 | 0.041958042 |
| ARHGAP42 | 8 | 6 | 0.307692308 | 0.272727273 | 0.034965035  | 0.034965035 |
| GPR125   | 8 | 6 | 0.307692308 | 0.272727273 | 0.034965035  | 0.034965035 |
| KLF4     | 8 | 6 | 0.307692308 | 0.272727273 | 0.034965035  | 0.034965035 |

## Online Supplementary Material

Shi, Y., et al. (2012) Analysis of differentiation potentials and gene expression profiles of mesenchymal stem cells derived from periodontal ligament and Wharton's jelly of the umbilical cord. Cells Tissues Organs, DOI: 10.1159/000 343740.

|          |    |   |             |             |              |             |
|----------|----|---|-------------|-------------|--------------|-------------|
| RASGRP3  | 8  | 6 | 0.307692308 | 0.272727273 | 0.034965035  | 0.034965035 |
| SLC15A3  | 8  | 6 | 0.307692308 | 0.272727273 | 0.034965035  | 0.034965035 |
| APOBEC3G | 5  | 5 | 0.192307692 | 0.227272727 | -0.034965035 | 0.034965035 |
| CDO1     | 5  | 5 | 0.192307692 | 0.227272727 | -0.034965035 | 0.034965035 |
| DAPK1    | 5  | 5 | 0.192307692 | 0.227272727 | -0.034965035 | 0.034965035 |
| FAM13A   | 5  | 5 | 0.192307692 | 0.227272727 | -0.034965035 | 0.034965035 |
| GALNT3   | 5  | 5 | 0.192307692 | 0.227272727 | -0.034965035 | 0.034965035 |
| HOXA11   | 5  | 5 | 0.192307692 | 0.227272727 | -0.034965035 | 0.034965035 |
| PPYR1    | 5  | 5 | 0.192307692 | 0.227272727 | -0.034965035 | 0.034965035 |
| UTY      | 5  | 5 | 0.192307692 | 0.227272727 | -0.034965035 | 0.034965035 |
| CDH4     | 9  | 7 | 0.346153846 | 0.318181818 | 0.027972028  | 0.027972028 |
| TGFBR1   | 9  | 7 | 0.346153846 | 0.318181818 | 0.027972028  | 0.027972028 |
| CD55     | 4  | 4 | 0.153846154 | 0.181818182 | -0.027972028 | 0.027972028 |
| COL4A5   | 4  | 4 | 0.153846154 | 0.181818182 | -0.027972028 | 0.027972028 |
| GUCY1A2  | 4  | 4 | 0.153846154 | 0.181818182 | -0.027972028 | 0.027972028 |
| ITGB8    | 4  | 4 | 0.153846154 | 0.181818182 | -0.027972028 | 0.027972028 |
| PAMR1    | 4  | 4 | 0.153846154 | 0.181818182 | -0.027972028 | 0.027972028 |
| RASGRP1  | 4  | 4 | 0.153846154 | 0.181818182 | -0.027972028 | 0.027972028 |
| STAMBPL1 | 4  | 4 | 0.153846154 | 0.181818182 | -0.027972028 | 0.027972028 |
| SYT1     | 4  | 4 | 0.153846154 | 0.181818182 | -0.027972028 | 0.027972028 |
| MMP16    | 10 | 9 | 0.384615385 | 0.409090909 | -0.024475524 | 0.024475524 |
| NR2F2    | 10 | 8 | 0.384615385 | 0.363636364 | 0.020979021  | 0.020979021 |
| DLX5     | 3  | 3 | 0.115384615 | 0.136363636 | -0.020979021 | 0.020979021 |
| HOXD10   | 3  | 3 | 0.115384615 | 0.136363636 | -0.020979021 | 0.020979021 |

## Online Supplementary Material

Shi, Y., et al. (2012) Analysis of differentiation potentials and gene expression profiles of mesenchymal stem cells derived from periodontal ligament and Wharton's jelly of the umbilical cord. Cells Tissues Organs, DOI: 10.1159/000 343740.

|         |    |    |             |             |              |             |
|---------|----|----|-------------|-------------|--------------|-------------|
| SGK3    | 3  | 3  | 0.115384615 | 0.136363636 | -0.020979021 | 0.020979021 |
| MGLL    | 4  | 3  | 0.153846154 | 0.136363636 | 0.017482517  | 0.017482517 |
| HOXA1   | 5  | 4  | 0.192307692 | 0.181818182 | 0.01048951   | 0.01048951  |
| HOXA4   | 5  | 4  | 0.192307692 | 0.181818182 | 0.01048951   | 0.01048951  |
| HOXD8   | 5  | 4  | 0.192307692 | 0.181818182 | 0.01048951   | 0.01048951  |
| PCDHB2  | 5  | 4  | 0.192307692 | 0.181818182 | 0.01048951   | 0.01048951  |
| SIX1    | 5  | 4  | 0.192307692 | 0.181818182 | 0.01048951   | 0.01048951  |
| SYTL2   | 5  | 4  | 0.192307692 | 0.181818182 | 0.01048951   | 0.01048951  |
| TBX20   | 5  | 4  | 0.192307692 | 0.181818182 | 0.01048951   | 0.01048951  |
| TEC     | 5  | 4  | 0.192307692 | 0.181818182 | 0.01048951   | 0.01048951  |
| ADAM12  | 8  | 7  | 0.307692308 | 0.318181818 | -0.01048951  | 0.01048951  |
| AKAP12  | 8  | 7  | 0.307692308 | 0.318181818 | -0.01048951  | 0.01048951  |
| HCFC2   | 8  | 7  | 0.307692308 | 0.318181818 | -0.01048951  | 0.01048951  |
| ITPR2   | 8  | 7  | 0.307692308 | 0.318181818 | -0.01048951  | 0.01048951  |
| PITX2   | 8  | 7  | 0.307692308 | 0.318181818 | -0.01048951  | 0.01048951  |
| SLC38A5 | 8  | 7  | 0.307692308 | 0.318181818 | -0.01048951  | 0.01048951  |
| SPON2   | 8  | 7  | 0.307692308 | 0.318181818 | -0.01048951  | 0.01048951  |
| ZFP36L2 | 8  | 7  | 0.307692308 | 0.318181818 | -0.01048951  | 0.01048951  |
| USP18   | 12 | 10 | 0.461538462 | 0.454545455 | 0.006993007  | 0.006993007 |
| AVP11   | 6  | 5  | 0.230769231 | 0.227272727 | 0.003496503  | 0.003496503 |
| BOC     | 6  | 5  | 0.230769231 | 0.227272727 | 0.003496503  | 0.003496503 |
| FBLN5   | 6  | 5  | 0.230769231 | 0.227272727 | 0.003496503  | 0.003496503 |
| H1FO    | 6  | 5  | 0.230769231 | 0.227272727 | 0.003496503  | 0.003496503 |
| IFI30   | 6  | 5  | 0.230769231 | 0.227272727 | 0.003496503  | 0.003496503 |

### Online Supplementary Material

Shi, Y., et al. (2012) Analysis of differentiation potentials and gene expression profiles of mesenchymal stem cells derived from periodontal ligament and Wharton's jelly of the umbilical cord. Cells Tissues Organs, DOI: 10.1159/000 343740.

|         |    |    |             |             |              |             |
|---------|----|----|-------------|-------------|--------------|-------------|
| IL11    | 6  | 5  | 0.230769231 | 0.227272727 | 0.003496503  | 0.003496503 |
| KCNAB1  | 6  | 5  | 0.230769231 | 0.227272727 | 0.003496503  | 0.003496503 |
| PHF11   | 6  | 5  | 0.230769231 | 0.227272727 | 0.003496503  | 0.003496503 |
| FAM13B  | 7  | 6  | 0.269230769 | 0.272727273 | -0.003496503 | 0.003496503 |
| FAS     | 7  | 6  | 0.269230769 | 0.272727273 | -0.003496503 | 0.003496503 |
| IL8     | 7  | 6  | 0.269230769 | 0.272727273 | -0.003496503 | 0.003496503 |
| NOTCH3  | 7  | 6  | 0.269230769 | 0.272727273 | -0.003496503 | 0.003496503 |
| PARP14  | 7  | 6  | 0.269230769 | 0.272727273 | -0.003496503 | 0.003496503 |
| PKDCC   | 7  | 6  | 0.269230769 | 0.272727273 | -0.003496503 | 0.003496503 |
| PLAU    | 7  | 6  | 0.269230769 | 0.272727273 | -0.003496503 | 0.003496503 |
| SCML1   | 7  | 6  | 0.269230769 | 0.272727273 | -0.003496503 | 0.003496503 |
| STAT2   | 7  | 6  | 0.269230769 | 0.272727273 | -0.003496503 | 0.003496503 |
| TTLL7   | 7  | 6  | 0.269230769 | 0.272727273 | -0.003496503 | 0.003496503 |
| CNTNAP3 | 26 | 22 | 1           | 1           | 0            | 0           |
| KRT18   | 13 | 11 | 0.5         | 0.5         | 0            | 0           |
