# Supplementary material
Source: publisher figshare collection journal article supplement (https://karger.figshare.com/articles/dataset/_/5124193)
Supplement: Supplementary file 2 [file 1]

## Online Supplementary Material

Shi, Y., et al. (2012) Analysis of differentiation potentials and gene expression profiles of mesenchymal stem cells derived from periodontal ligament and Wharton's jelly of the umbilical cord. Cells Tissues Organs, DOI: 10.1159/000 343740.

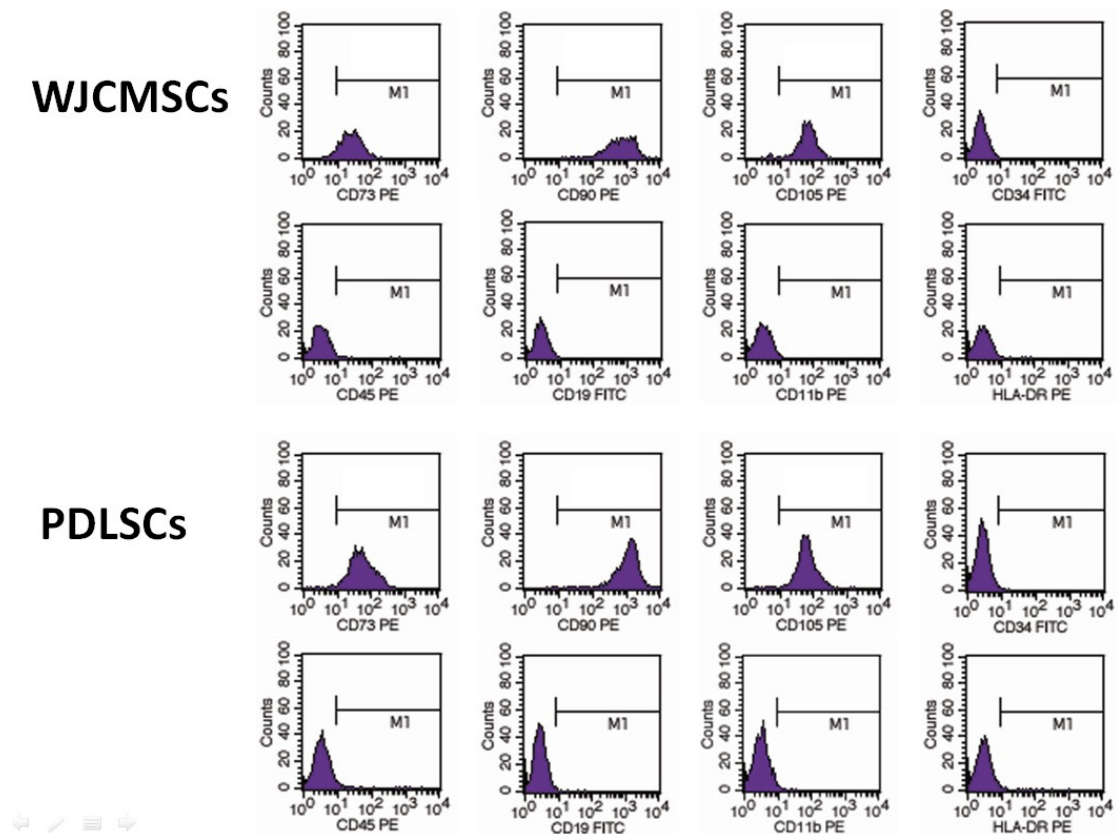

**Fig. S1.** Cell surface markers of two types of mesenchymal stem cells, WJCMSCs and PDLSCs. In each panel, the peak labeled with M1 depicts the cell population stained with an appropriate antibody.

## Online Supplementary Material

Shi, Y., et al. (2012) Analysis of differentiation potentials and gene expression profiles of mesenchymal stem cells derived from periodontal ligament and Wharton's jelly of the umbilical cord. *Cells Tissues Organs*, DOI: 10.1159/000 343740.

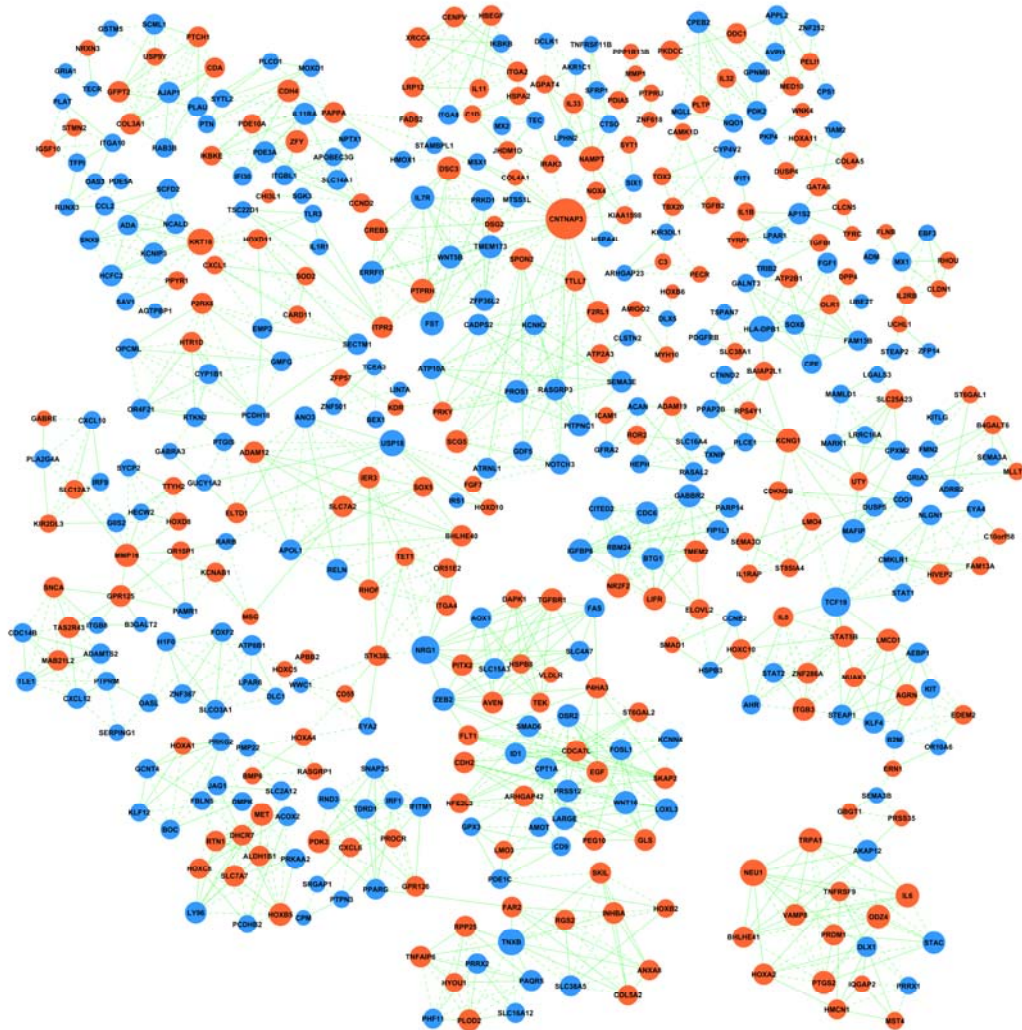

**Fig. S2.** Gene co-expression network in PDLSCs (Gene-Rel-Net). The circles represent genes (red represents up-regulated genes and blue represents down-regulated genes in WJCMSCs). The lines represent the regulatory relationships between genes (solid lines represent positive correlations, dotted lines represent negative correlations). The size represents the degree of centrality.

## Online Supplementary Material

Shi, Y., et al. (2012) Analysis of differentiation potentials and gene expression profiles of mesenchymal stem cells derived from periodontal ligament and Wharton's jelly of the umbilical cord. *Cells Tissues Organs*, DOI: 10.1159/000 343740.

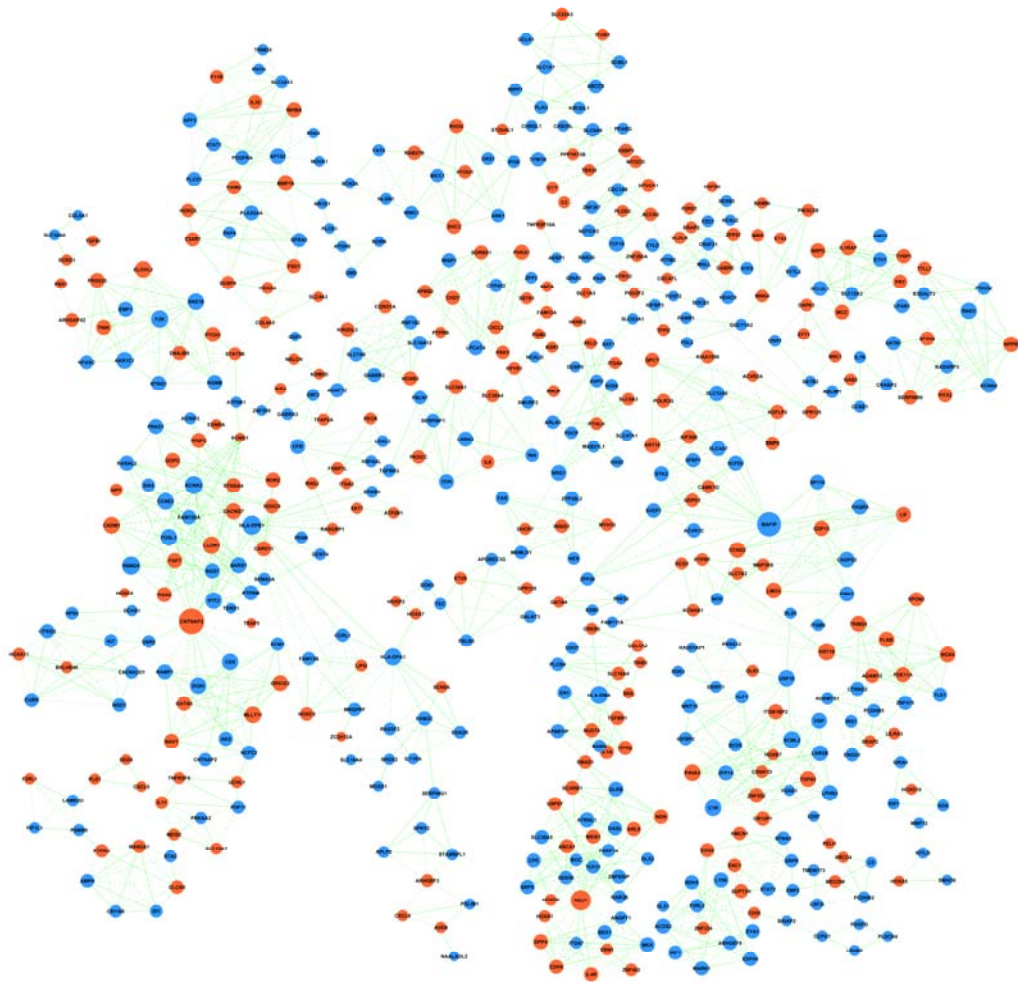

**Fig. S3.** Gene co-expression network in WJCMSCs (Gene-Rel-Net). The circles represent genes (red represents up-regulated genes and blue represents down-regulated genes in WJCMSCs). The lines represent the regulatory relationships between genes (solid lines represent positive correlations, dotted lines represent negative correlations). The size represents the degree of centrality.
